# Supplementary material for: Synthesis, Biological Evaluation and Stability Studies of Some Novel Aza-Acridine Aminoderivatives
Source: MDPI journal article supplement (doi:10.3390/molecules25194584), 2020-10-08
Supplement: s1 [file s1]

## Article

# Synthesis, Biological Evaluation and Stability Studies of some Novel Aza-acridine Aminoderivatives.

Maria Karelou <sup>1</sup>, Athanasia P. Tragomalou <sup>2</sup>, Vasileios Kourafalos <sup>1</sup>, Panagiotis Marakos <sup>1</sup>, Nicole Pouli <sup>1</sup>, Ourania E. Tsitsilonis <sup>2</sup>, Evangelos Gikas <sup>3,\*</sup>, Ioannis K. Kostakis <sup>1,\*</sup>.

<sup>1</sup> Department of Pharmacy, Division of Pharmaceutical Chemistry, National and Kapodistrian University of Athens, Panepistimiopolis, Zografou, 15771, Athens, Greece.

<sup>2</sup> Section of Animal & Human Physiology, Department of Biology, National & Kapodistrian University of Athens,, Panepistimiopolis, Ilissia, Athens, Greece.

<sup>3</sup> Laboratory of Analytical Chemistry, Department of Chemistry, National and Kapodistrian University of Athens, Panepistimiopolis, Zografou, 157 71, Athens, Greece.

# current address: Division of Endocrinology, Metabolism and Diabetes, 1<sup>st</sup> Department of Pediatrics, Medical School, “Aghia Sophia” Children’s Hospital, National and Kapodistrian University of Athens, Athens, Greece

\* Correspondence: [vgikas@chem.uoa.gr](mailto:vgikas@chem.uoa.gr), [ikkostakis@pharm.uoa.gr](mailto:ikkostakis@pharm.uoa.gr)

Received: date; Accepted: date; Published: date

## Contents

**Figure S1a and b:** Electrostatic potential map ESP of compounds **25** and **29**

**Figure S2 a and b:** Electron localization function ELF isosurface of compounds **25** and **29**

**Figure S3 a and b:** Fukui function of compounds **25** and **29**

**Figure S4 a, b, c and d:** QTAIM of the Rho in the amide plane of compounds **25** and **29** (a and c show the mapped contour c and d the isovalues)

**Figure S5:** <sup>1</sup>H NMR and <sup>13</sup>C NMR spectrum of compound **4**.

**Figure S6:** <sup>1</sup>H NMR and <sup>13</sup>C NMR spectrum of compound **5**.

**Figure S7:** <sup>1</sup>H NMR and <sup>13</sup>C NMR spectrum of compound **6**.

**Figure S8:** <sup>1</sup>H NMR and <sup>13</sup>C NMR spectrum of compound **7**.

**Figure S9:** <sup>1</sup>H NMR and <sup>13</sup>C NMR spectrum of compound **8**.

**Figure S10:** <sup>1</sup>H NMR and <sup>13</sup>C NMR spectrum of compound **9**.

**Figure S11:** <sup>1</sup>H NMR and <sup>13</sup>C NMR spectrum of compound **10**.

**Figure S12:** <sup>1</sup>H NMR and <sup>13</sup>C NMR spectrum of compound **11**.

**Figure S13:** <sup>1</sup>H NMR and <sup>13</sup>C NMR spectrum of compound **12**.

**Figure S14:** <sup>1</sup>H NMR and <sup>13</sup>C NMR spectrum of compound **13**.

**Figure S15:** <sup>1</sup>H NMR and <sup>13</sup>C NMR spectrum of compound **22**.

**Figure S16:** <sup>1</sup>H NMR and <sup>13</sup>C NMR spectrum of compound **23**.

**Figure S17:** <sup>1</sup>H NMR and <sup>13</sup>C NMR spectrum of compound **24**.

**Figure S18:** <sup>1</sup>H NMR and <sup>13</sup>C NMR spectrum of compound **25**.

**Figure S19:** <sup>1</sup>H NMR and <sup>13</sup>C NMR spectrum of compound **26**.

**Figure S20:**  $^1\text{H}$  NMR and  $^{13}\text{C}$  NMR spectrum of compound **27**.

**Figure S21:**  $^1\text{H}$  NMR and  $^{13}\text{C}$  NMR spectrum of compound **28**.

**Figure S22:**  $^1\text{H}$  NMR and  $^{13}\text{C}$  NMR spectrum of compound **29**.

**Figure S23:** Structures of positive controls.

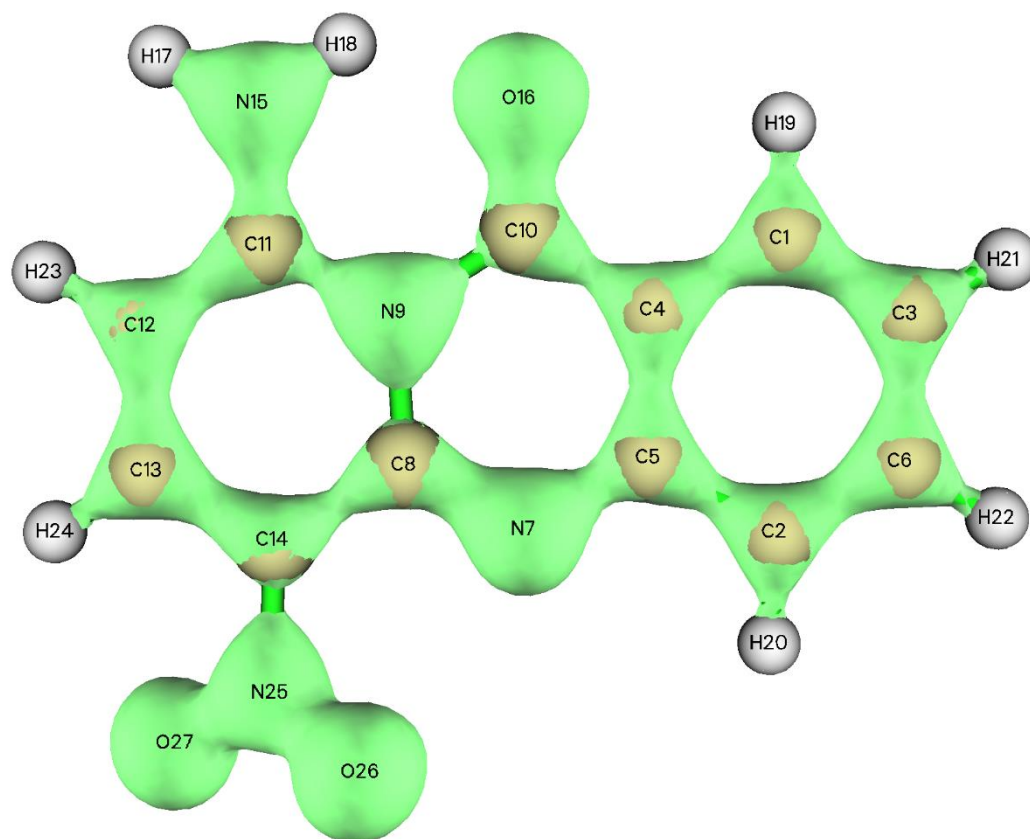

Figure S1a Electrostatic potential map of compound **25**

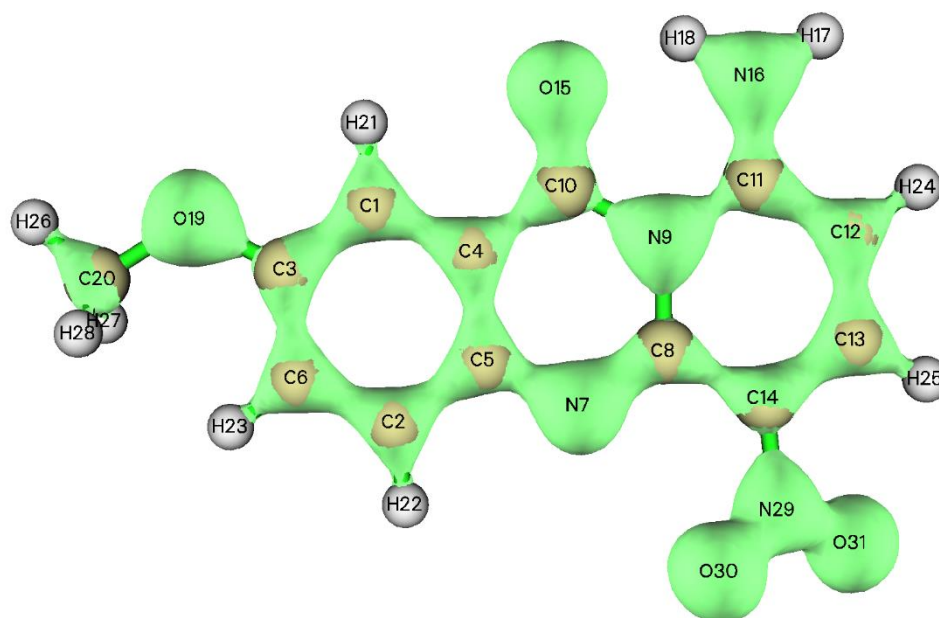

Figure S1b. Electrostatic potential map of compound **29**

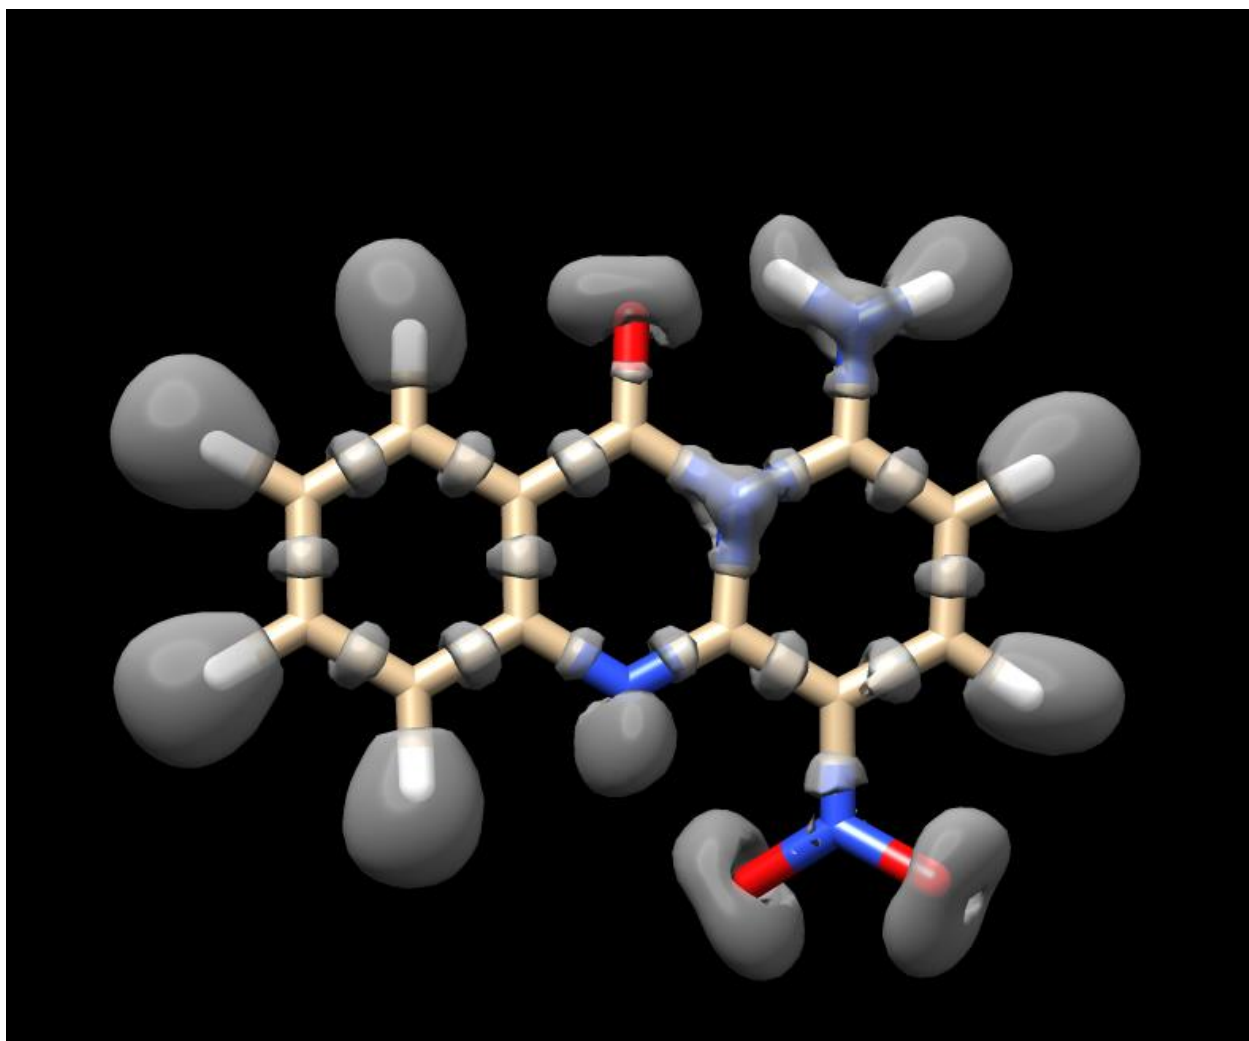

Figure S2a Electron localization function ELF isosurfaces of the compound **25**.

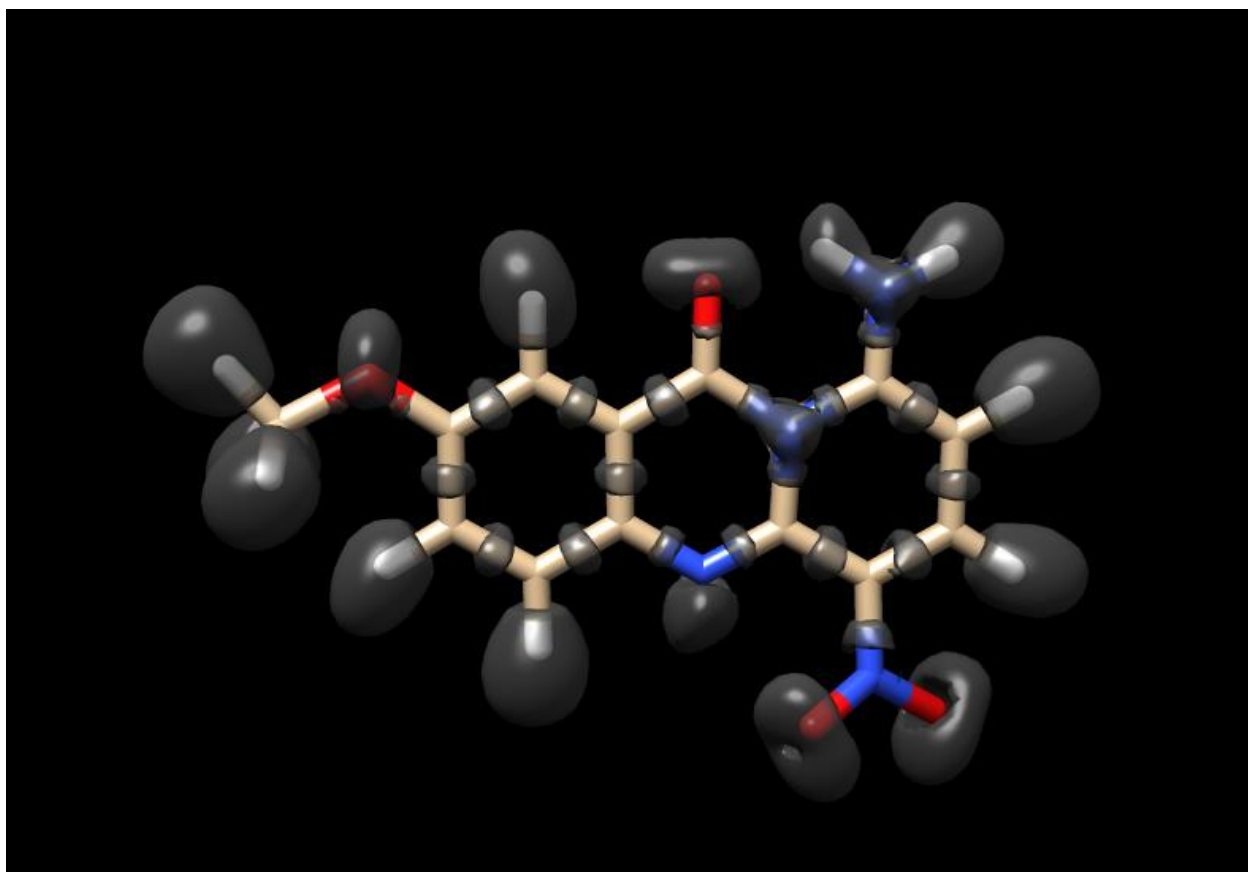

Figure S2b Electron localization function isosurfaces of the compound **29**.

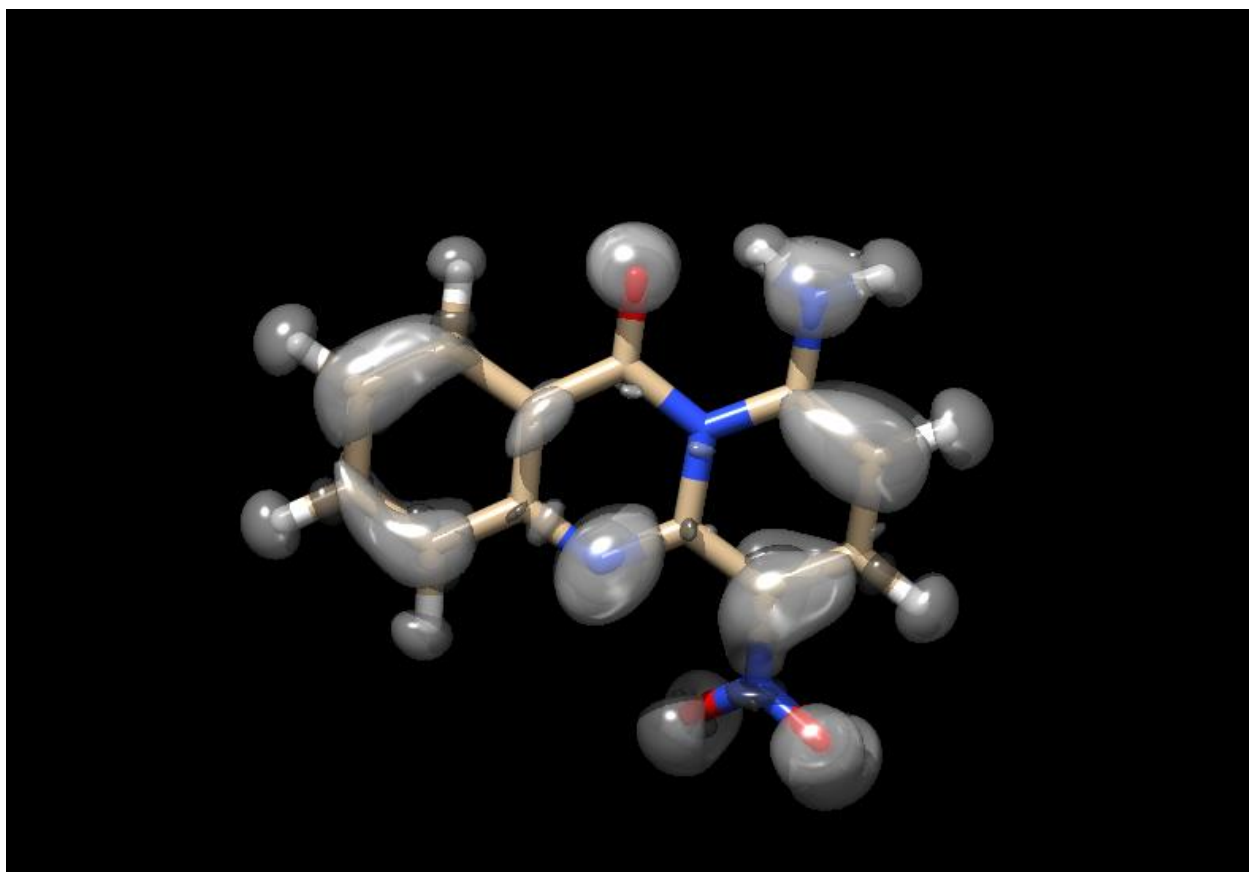

Figure S3a Fukui electrophilicity function  $f^-$  function isosurface for compound 25.

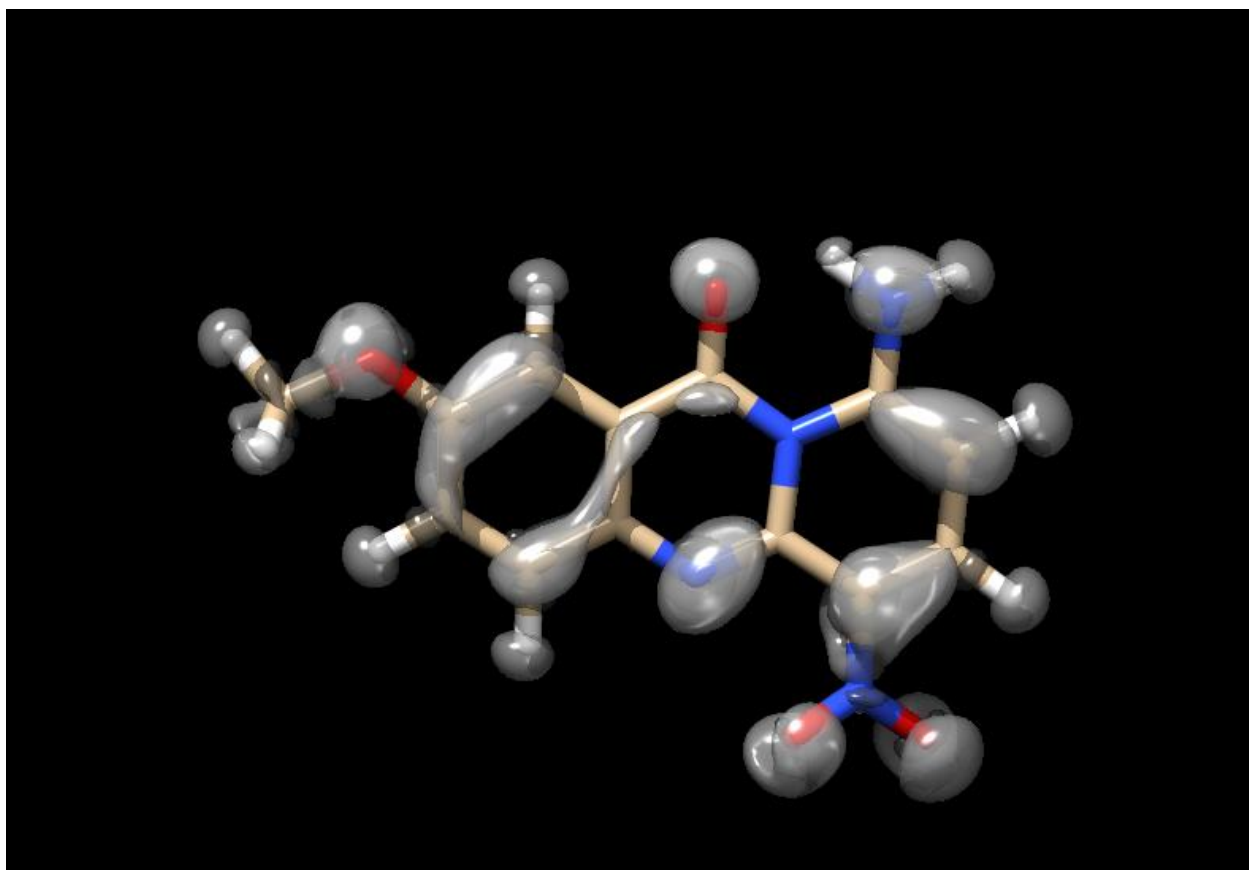

Figure S3b Fukui electrophilicity function  $f^-$  function isosurface for compound **29**.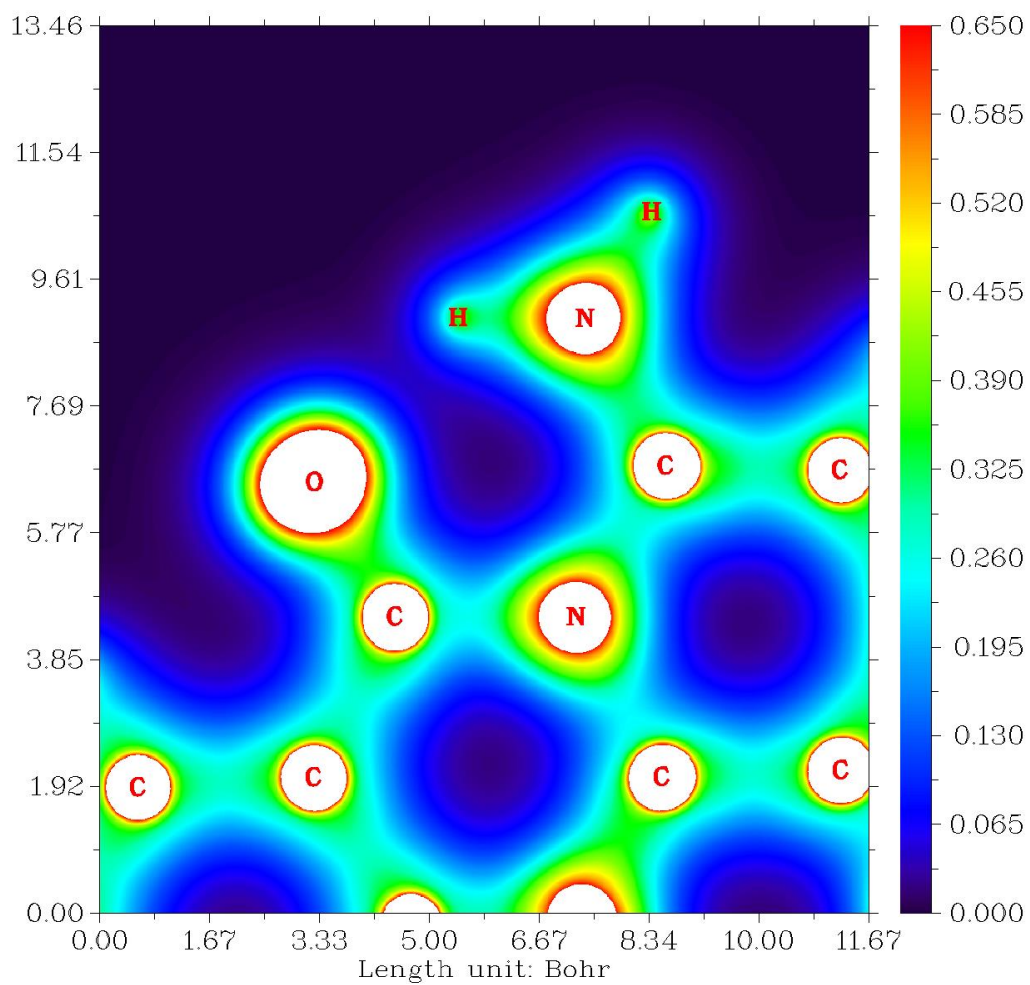Figure S4a QTAIM of the Rho in the amide plane of compound **25**



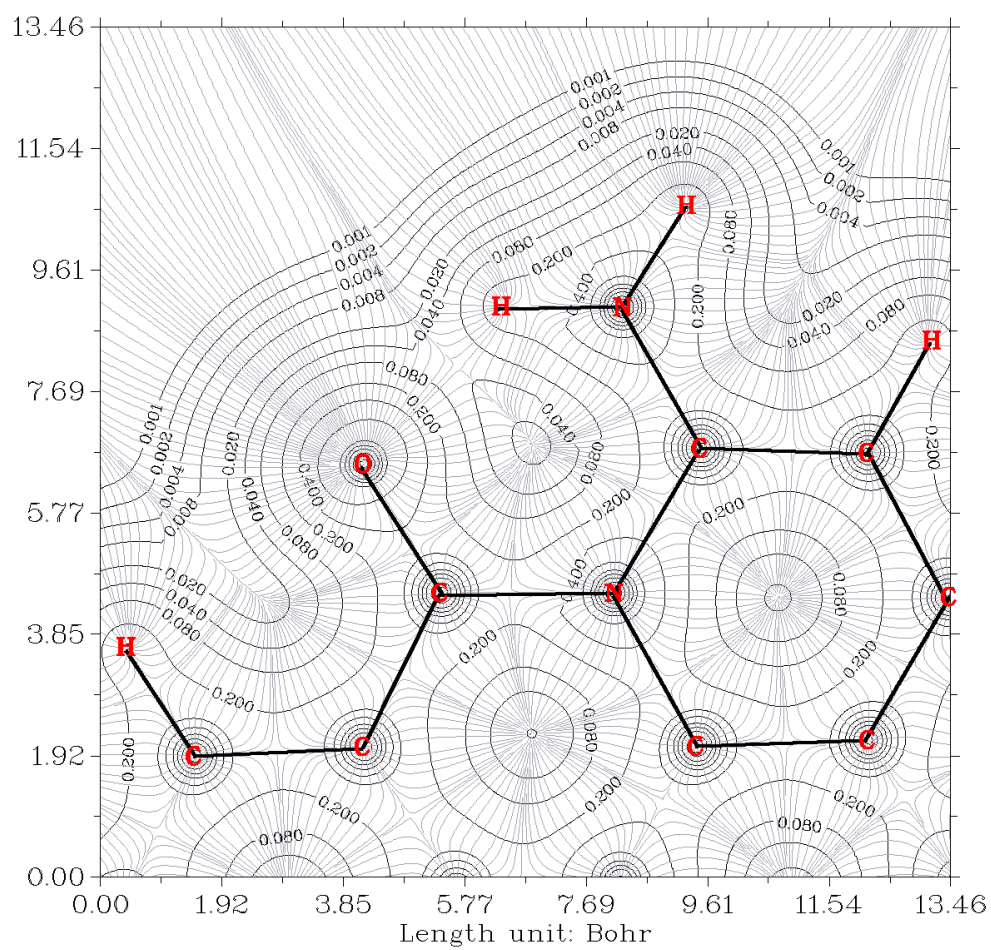

Figure S4b QTAIM of the  $\rho$  in the amide plane of compound **25** with the isovalues made visible

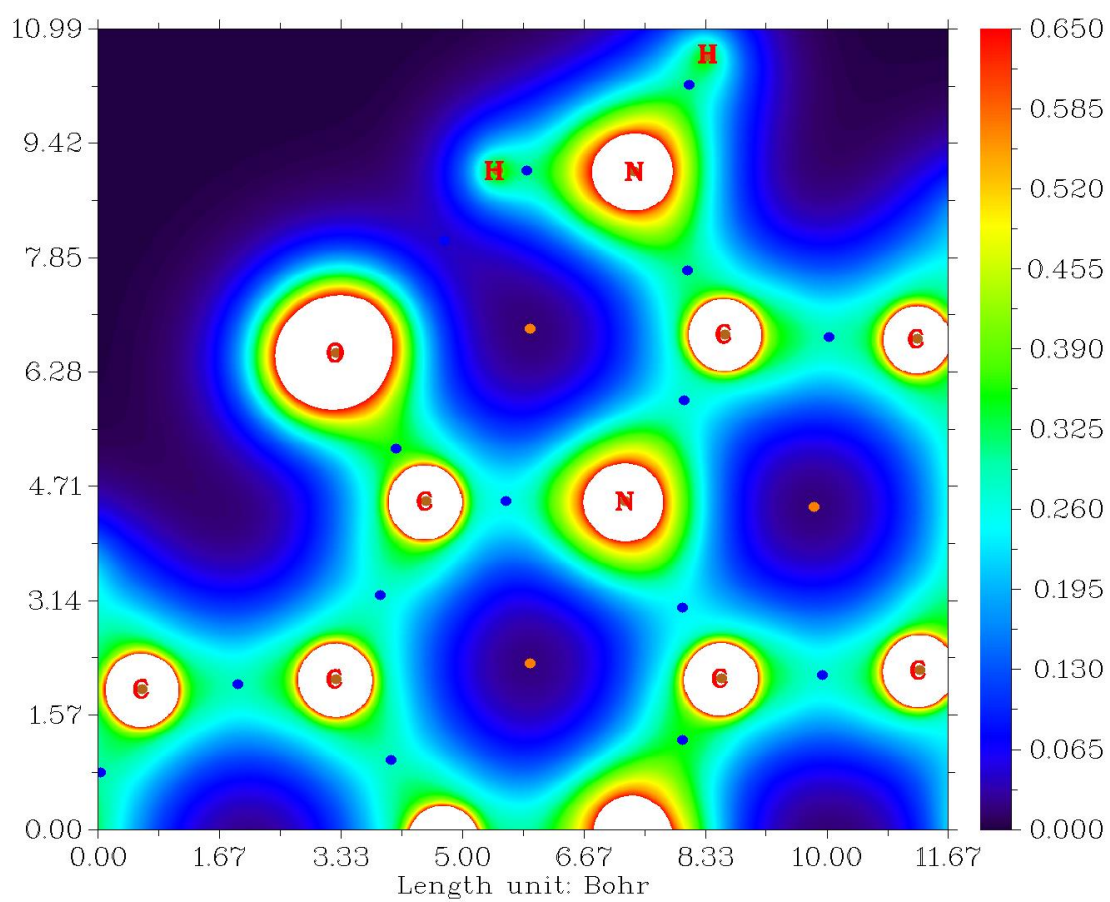

Figure S4c QTAIM of the Rho in the amide plane of compound **29**

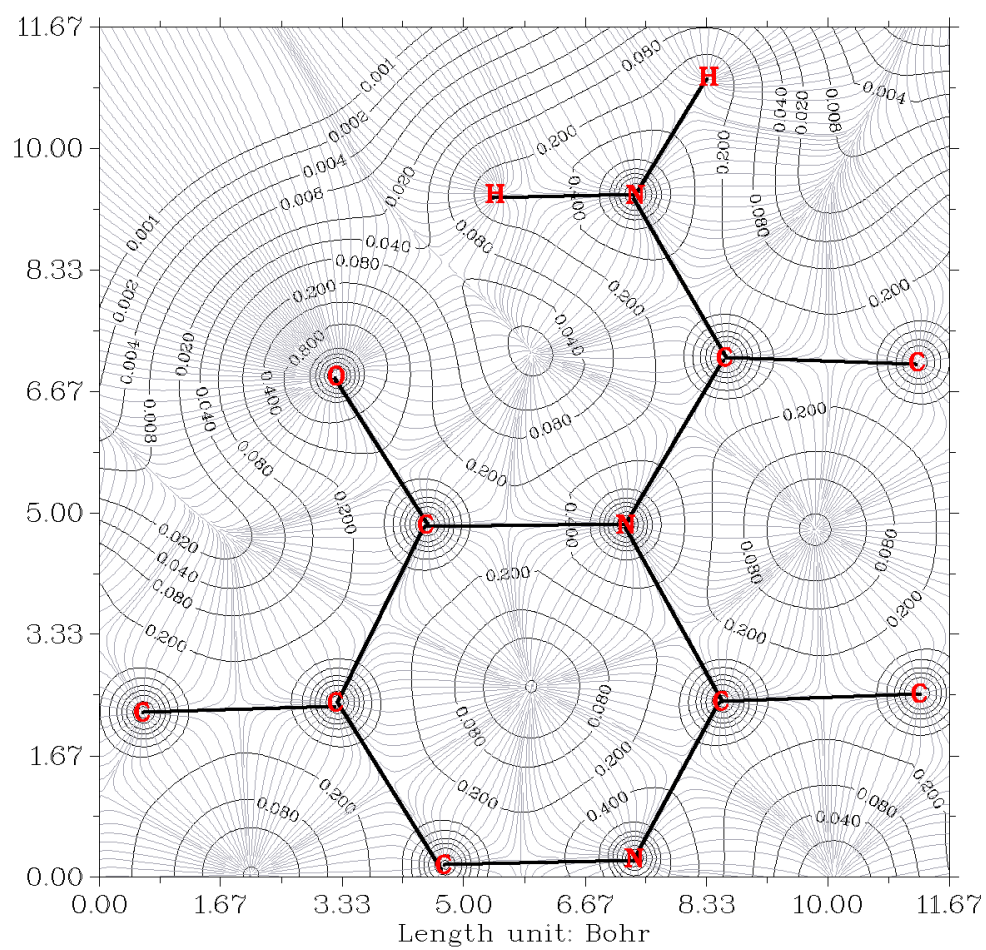

Figure S4d QTAIM of the Rho in the amide plane of compound **29** with the isovalues made visible

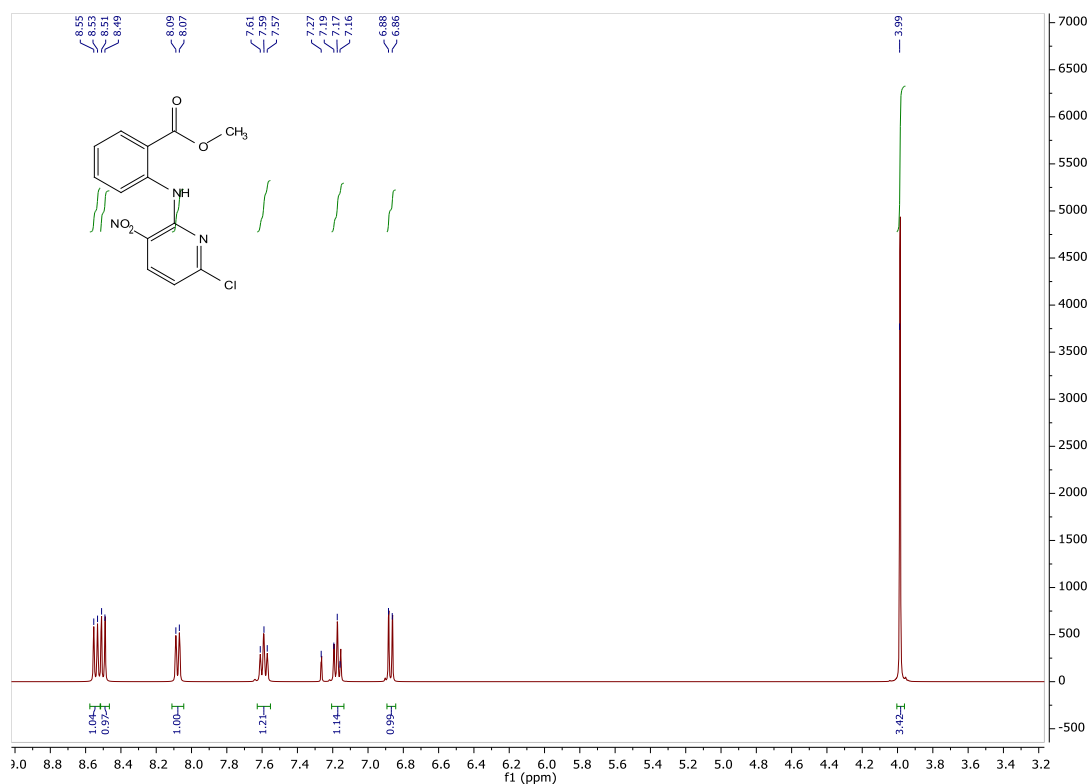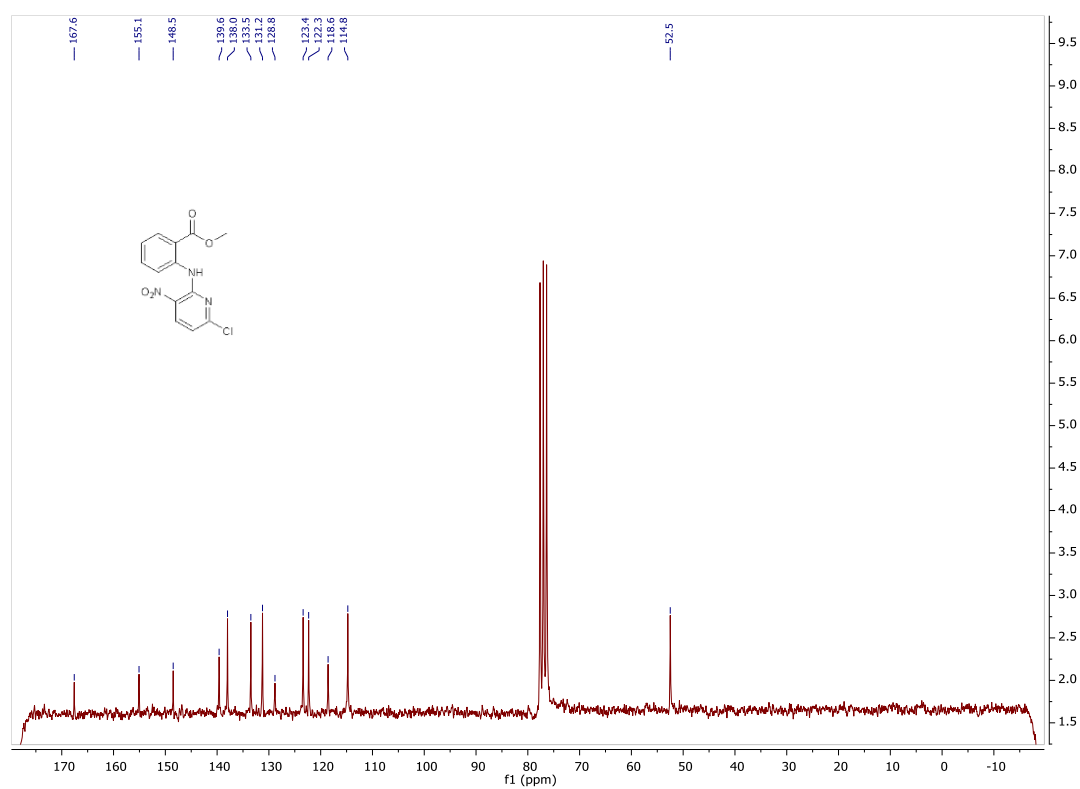

Figure S5: <sup>1</sup>H NMR and <sup>13</sup>C NMR spectrum of compound 4.

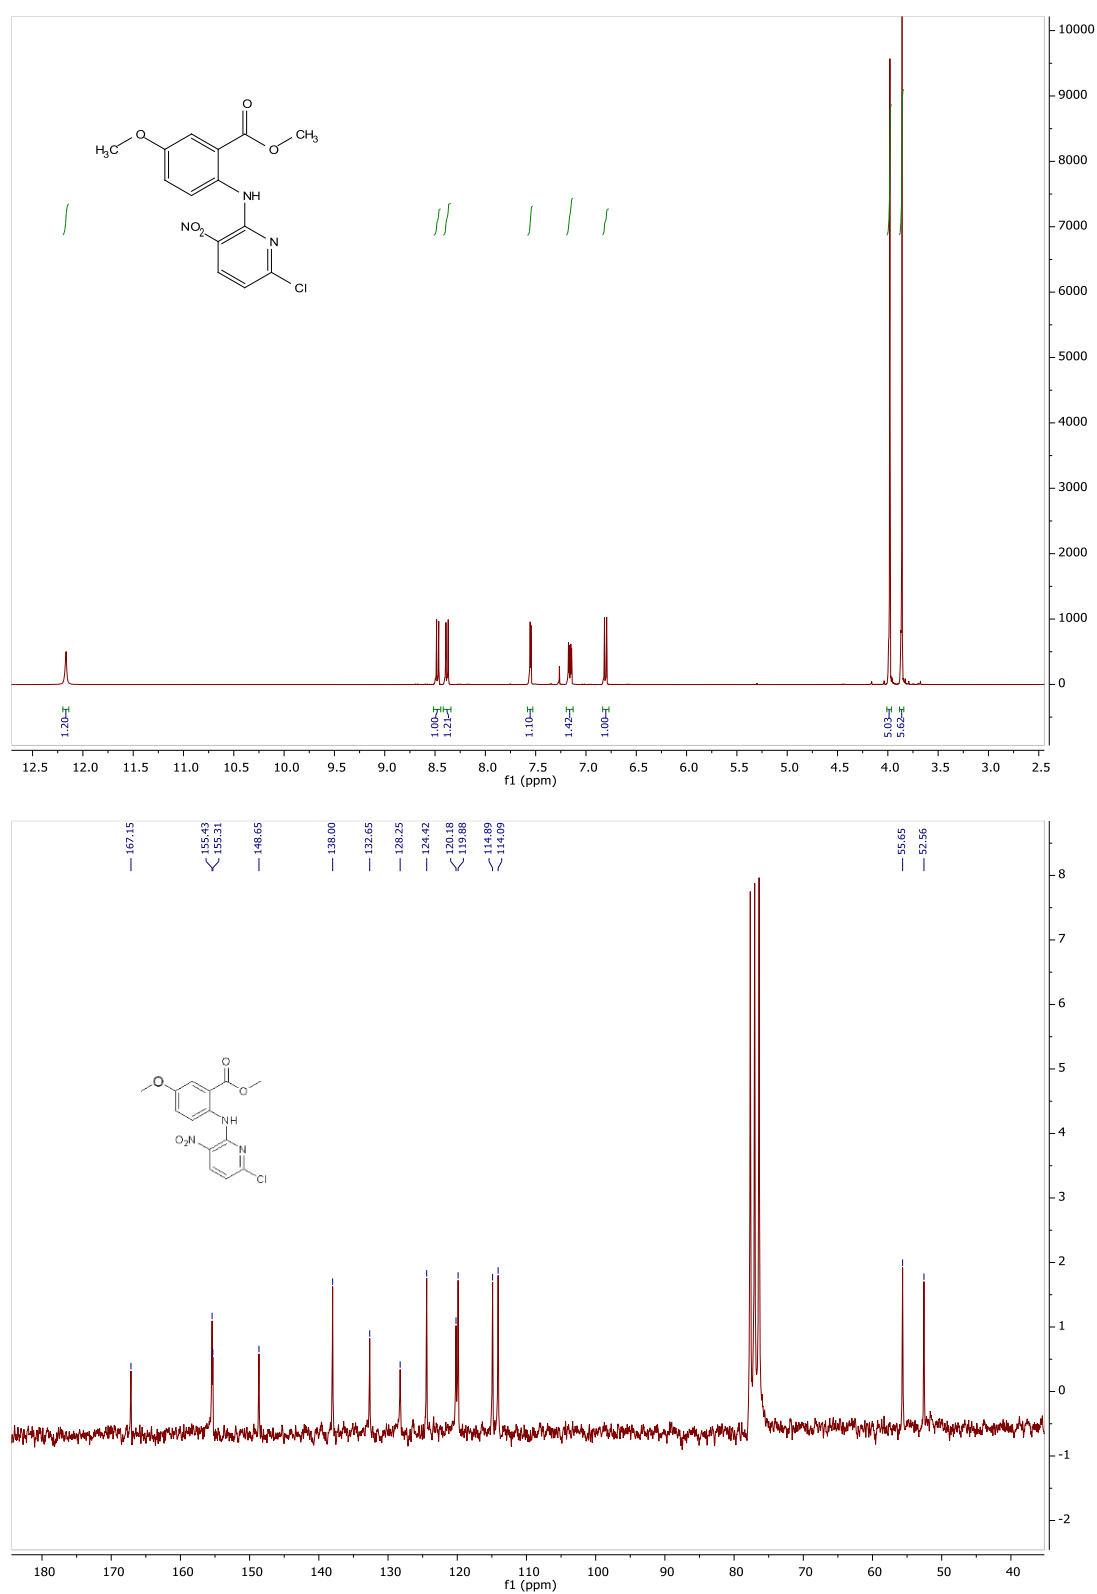

Figure S6:  $^1\text{H}$  NMR and  $^{13}\text{C}$  NMR spectrum of compound 5.

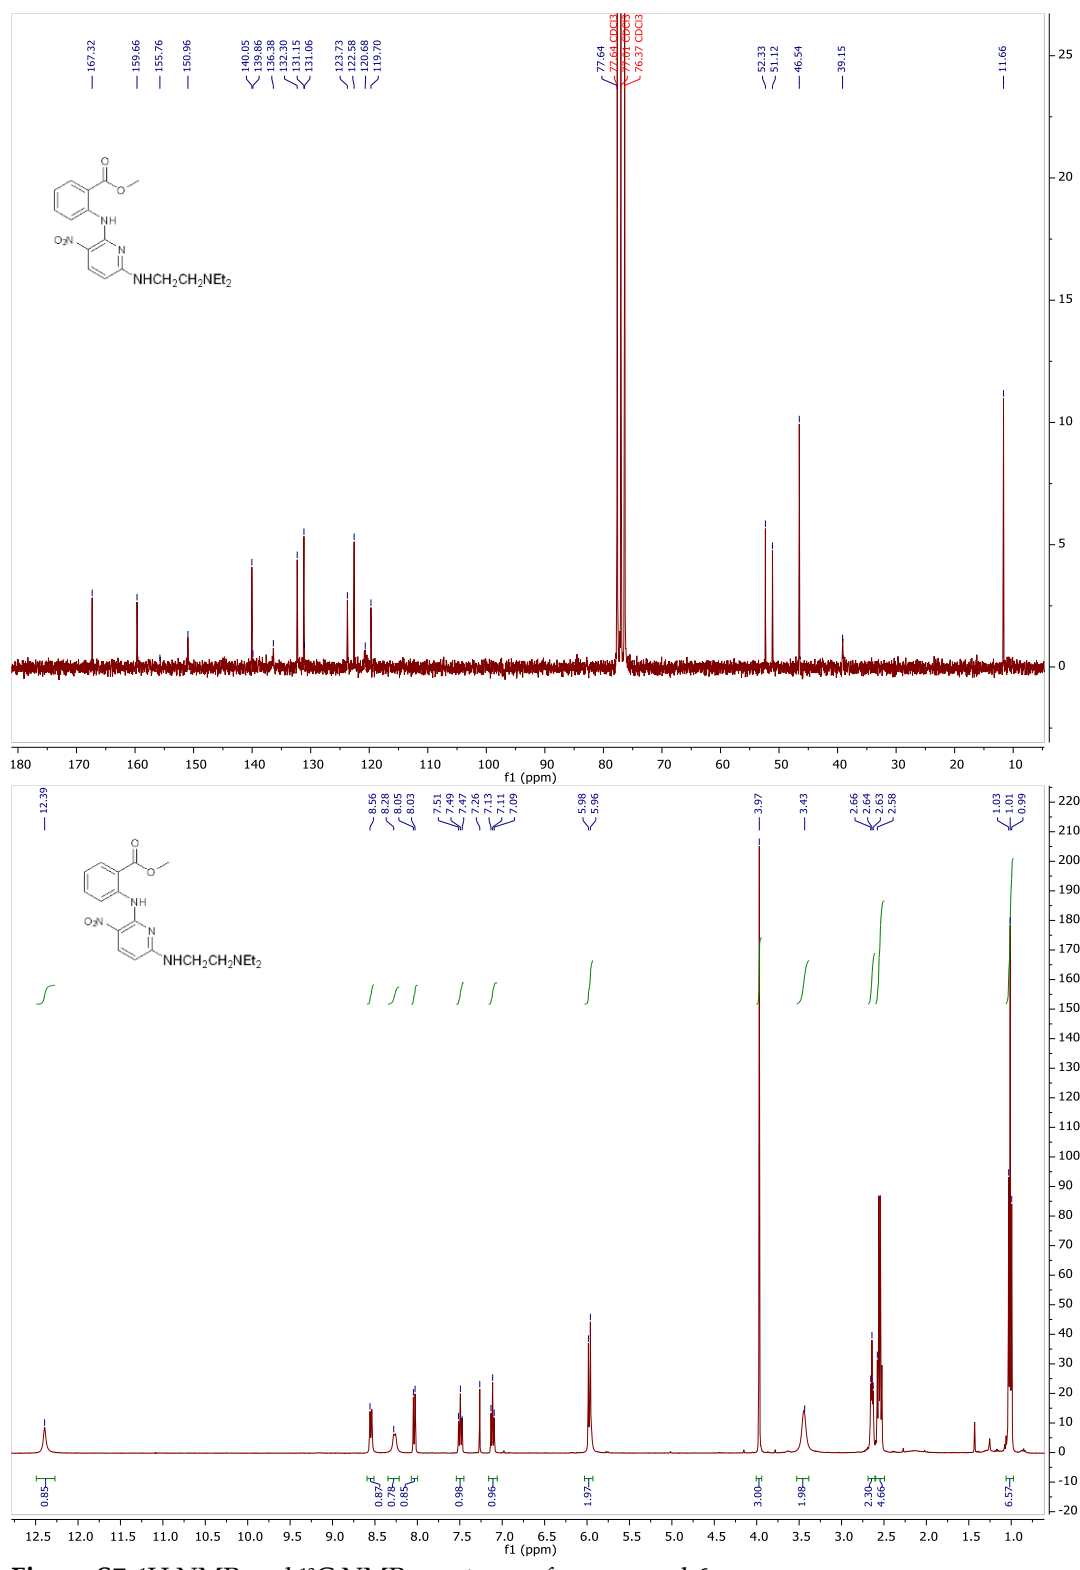

Figure S7: <sup>1</sup>H NMR and <sup>13</sup>C NMR spectrum of compound 6.

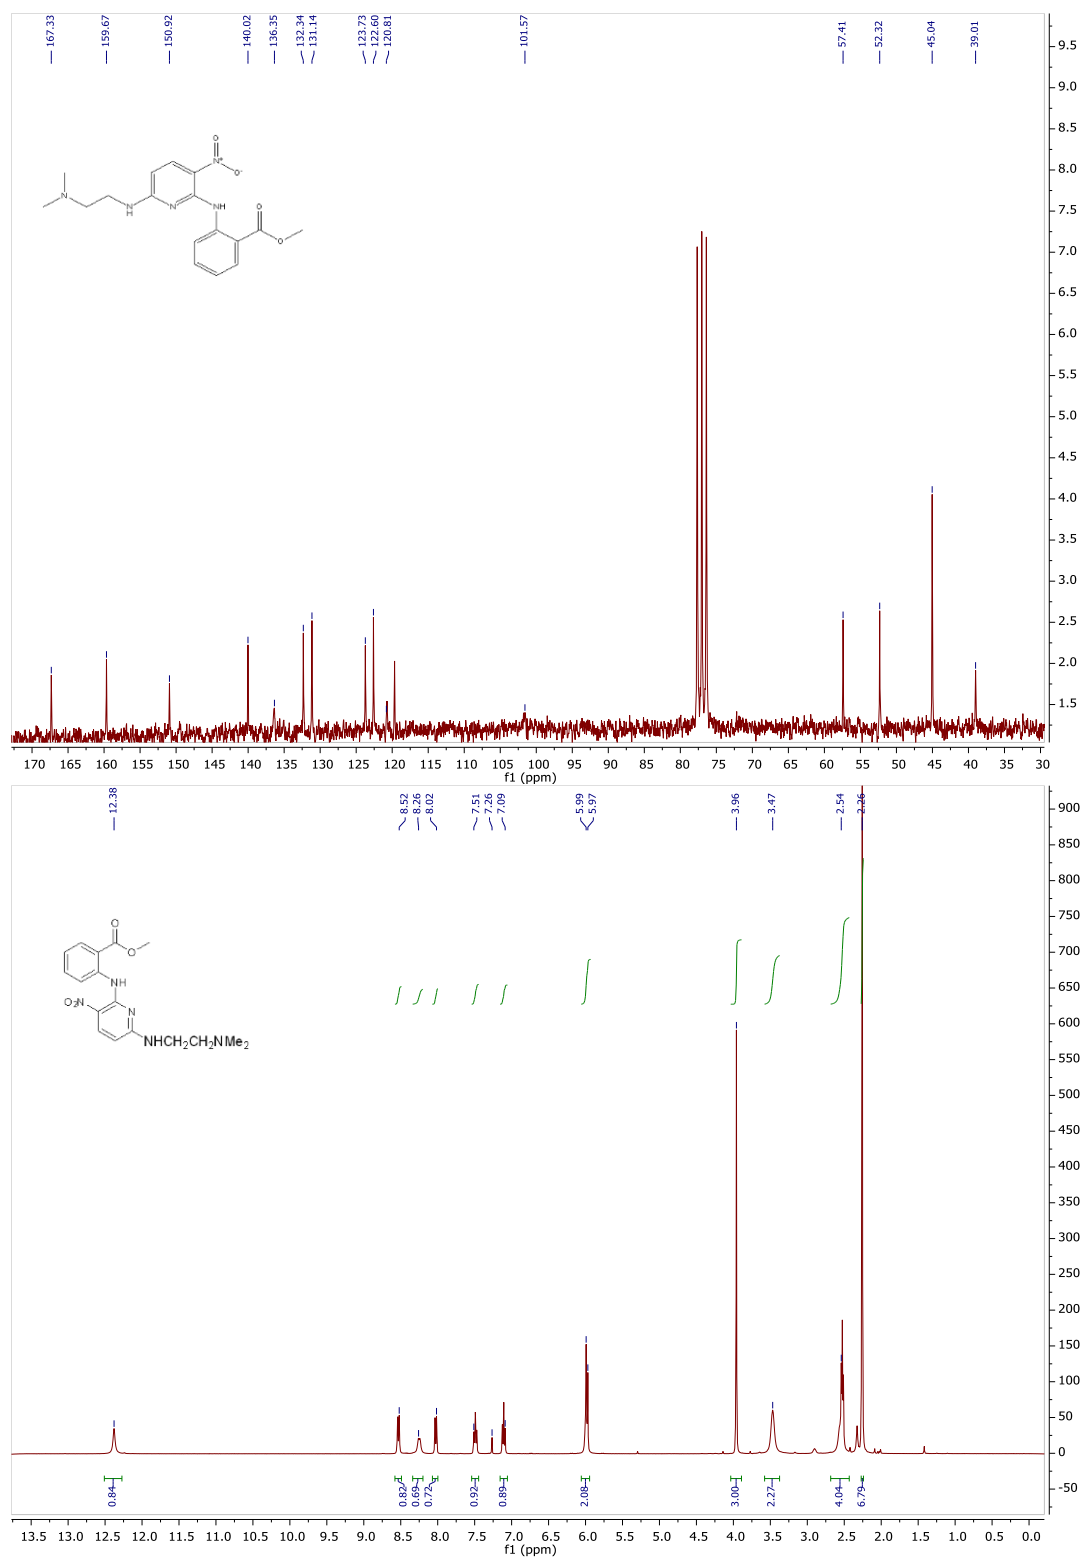

**Figure S8:** <sup>1</sup>H NMR and <sup>13</sup>C NMR spectrum of compound 7.

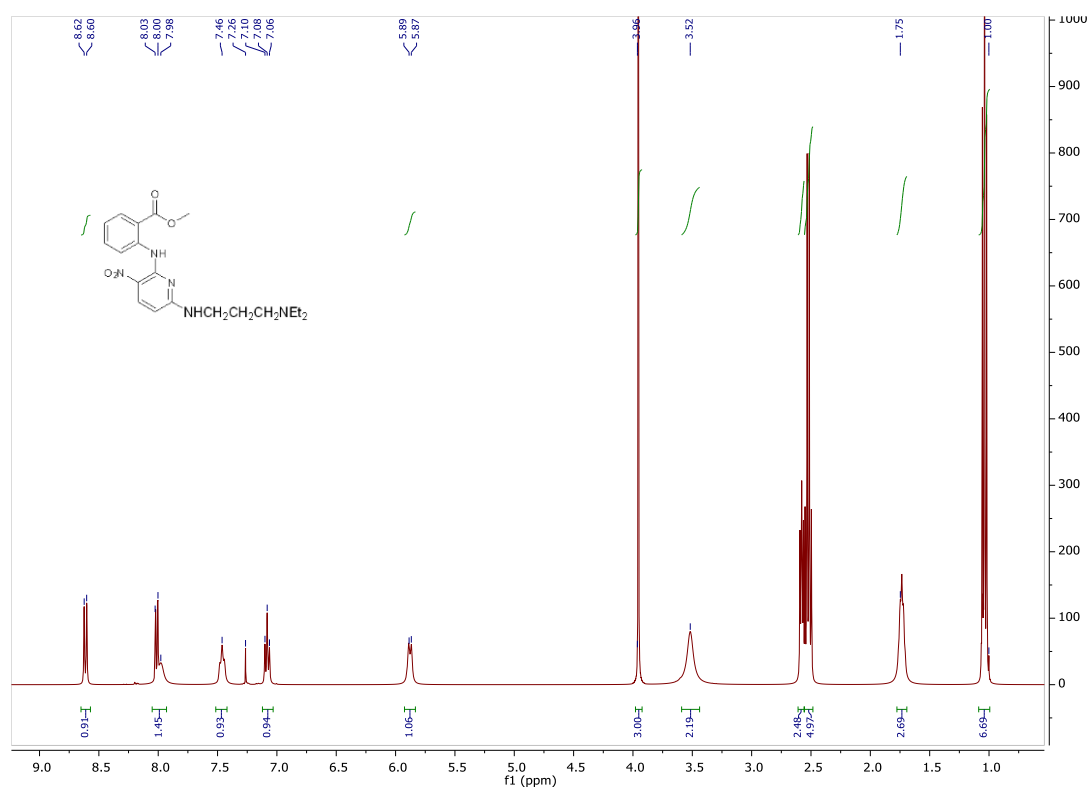

Figure S9: <sup>1</sup>H NMR and <sup>13</sup>C NMR spectrum of compound 8.



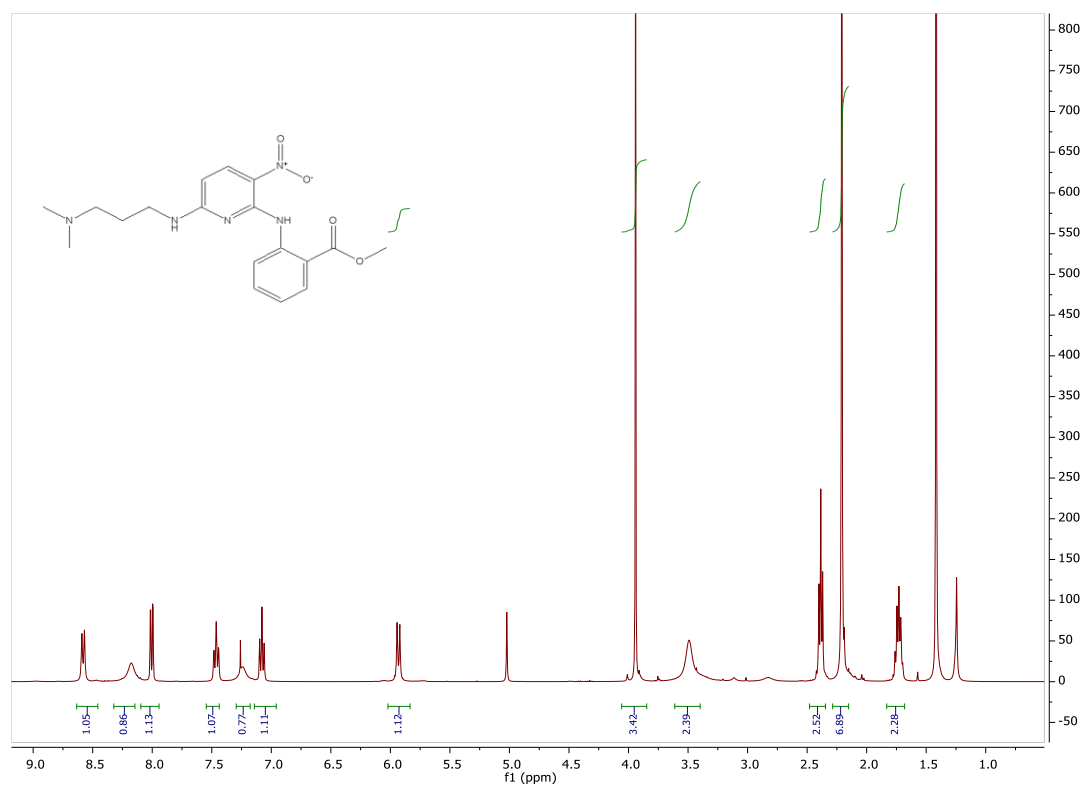

**Figure S10:** <sup>1</sup>H NMR and <sup>13</sup>C NMR spectrum of compound **9**.

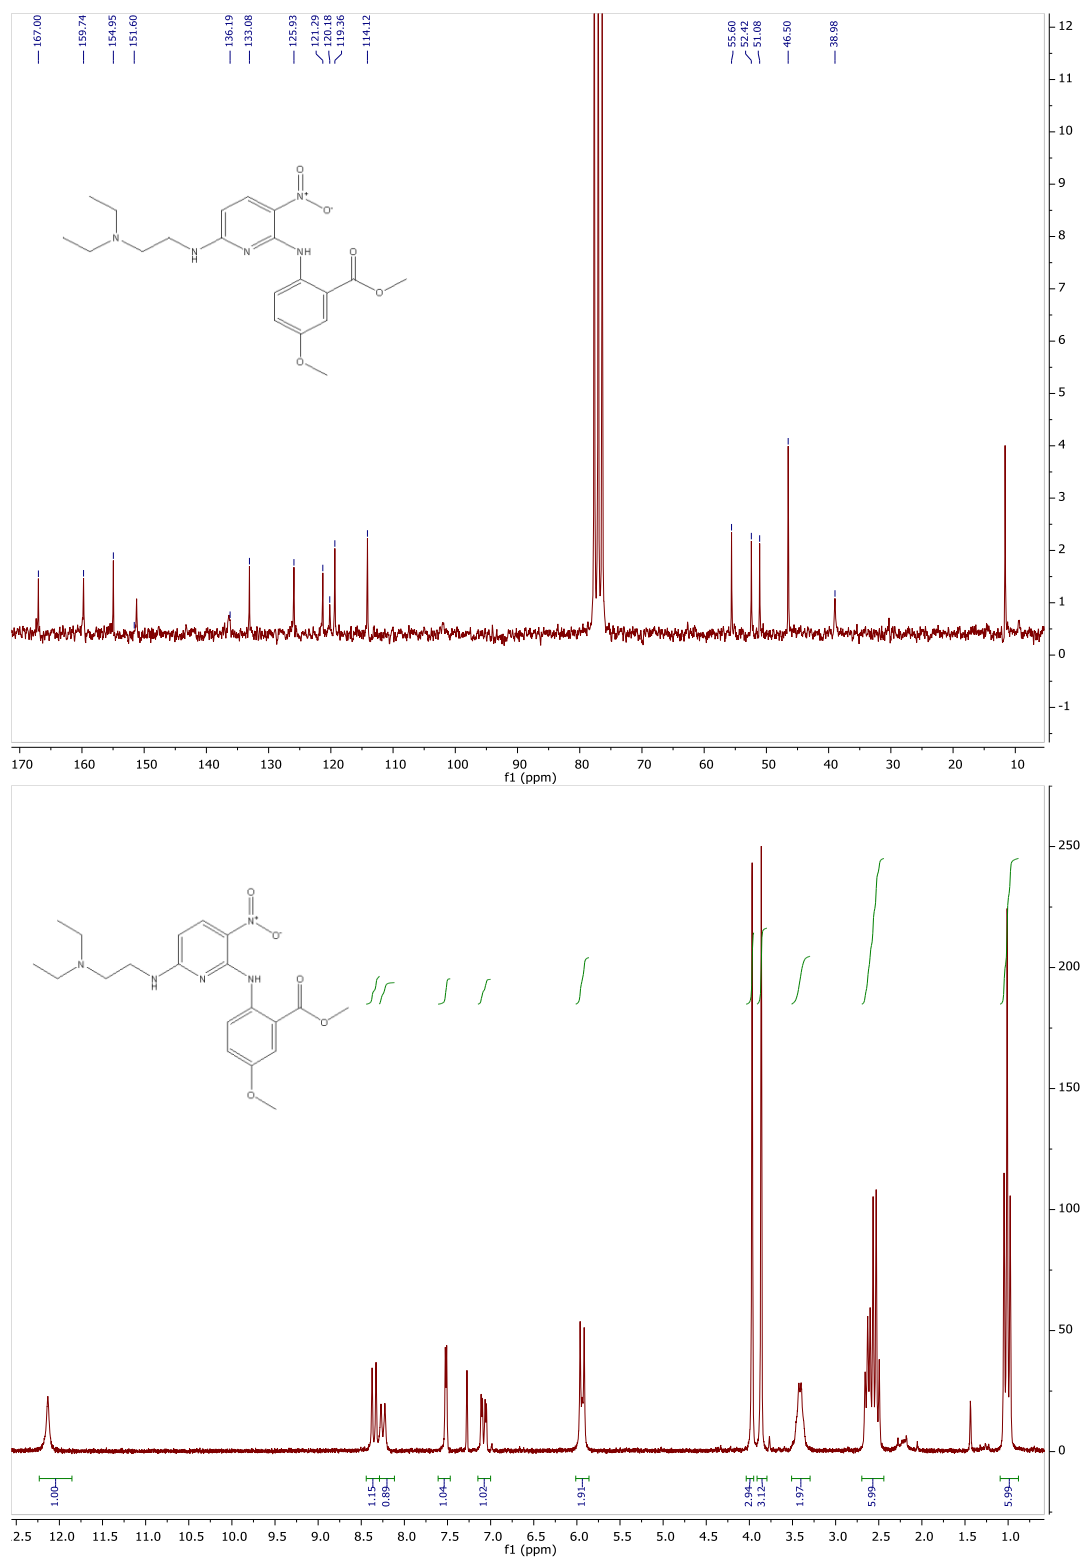

Figure S11: <sup>1</sup>H NMR and <sup>13</sup>C NMR spectrum of compound 10.

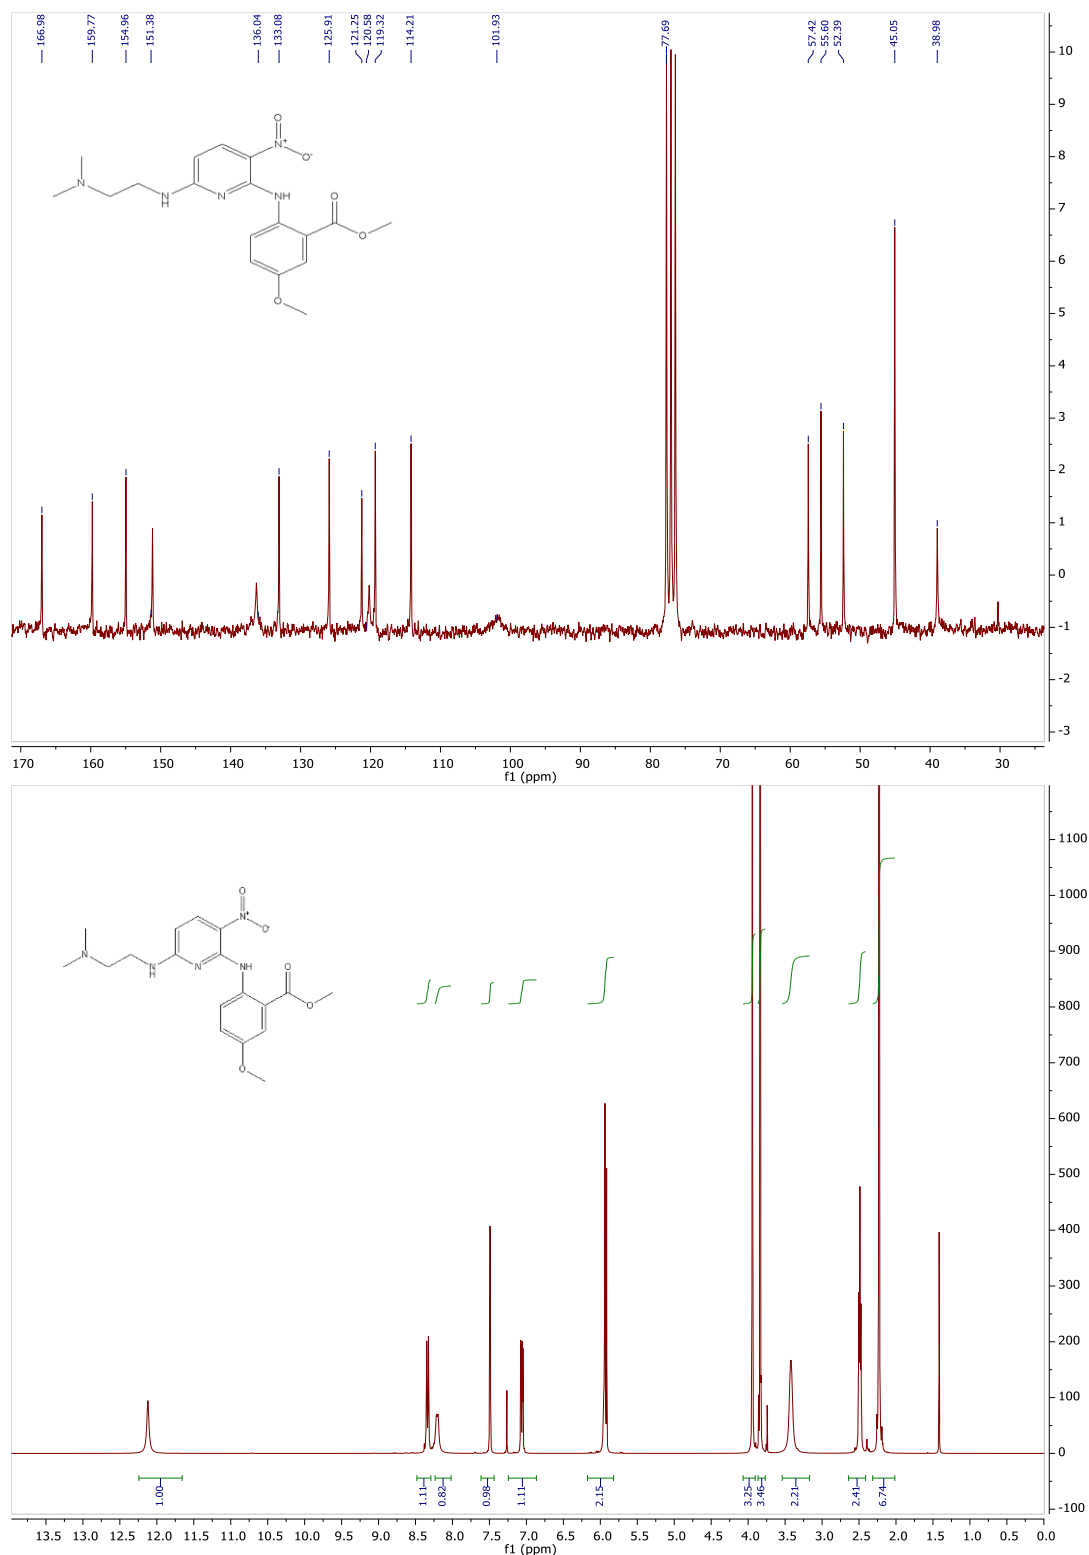

Figure S12:  $^1\text{H}$  NMR and  $^{13}\text{C}$  NMR spectrum of compound 11.

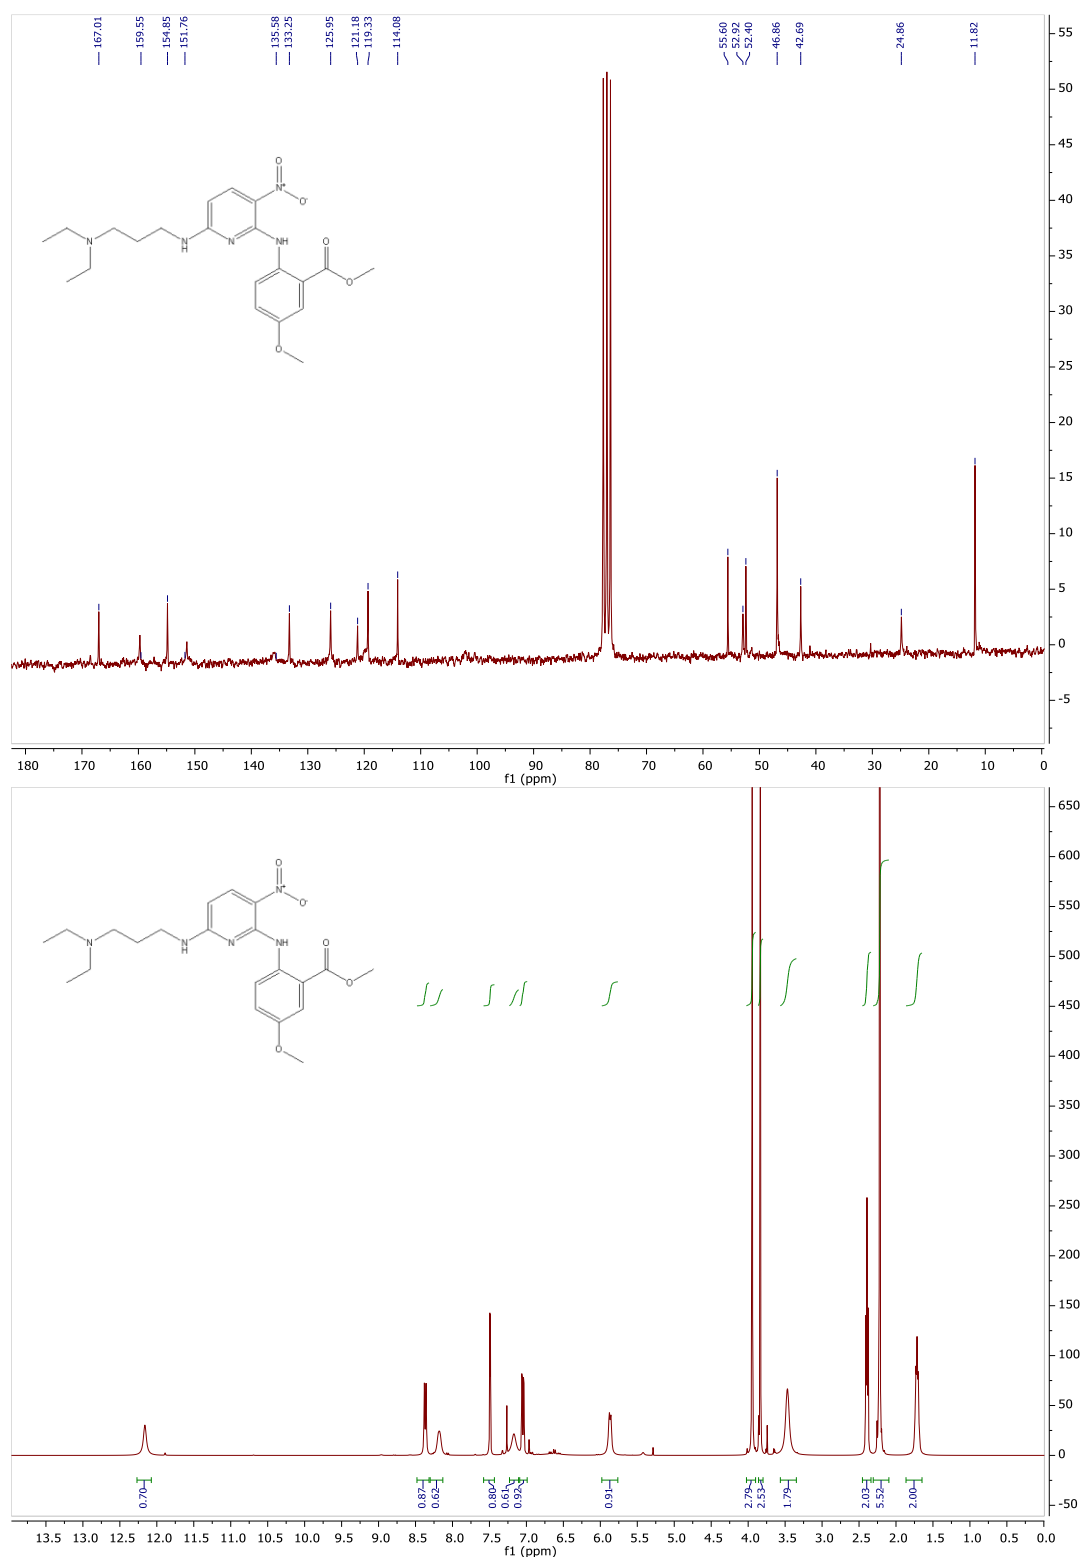

Figure S13: <sup>1</sup>H NMR and <sup>13</sup>C NMR spectrum of compound 12.

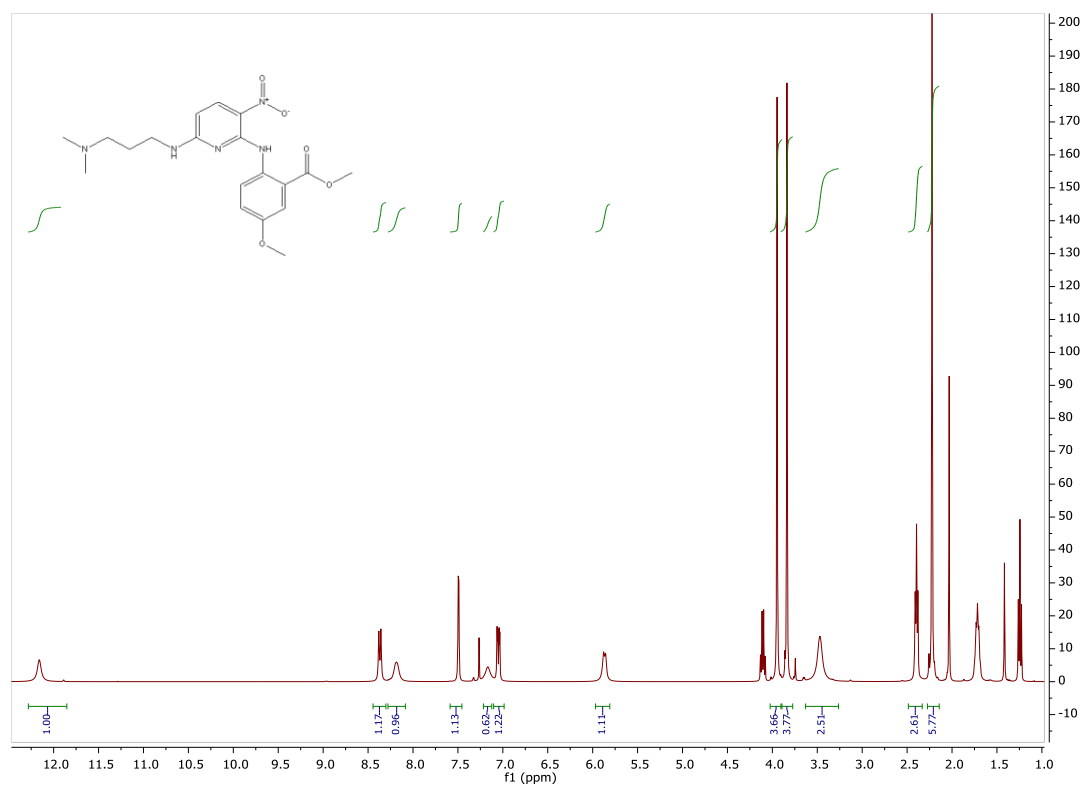

**Figure S14:** <sup>1</sup>H NMR and <sup>13</sup>C NMR spectrum of compound 13.

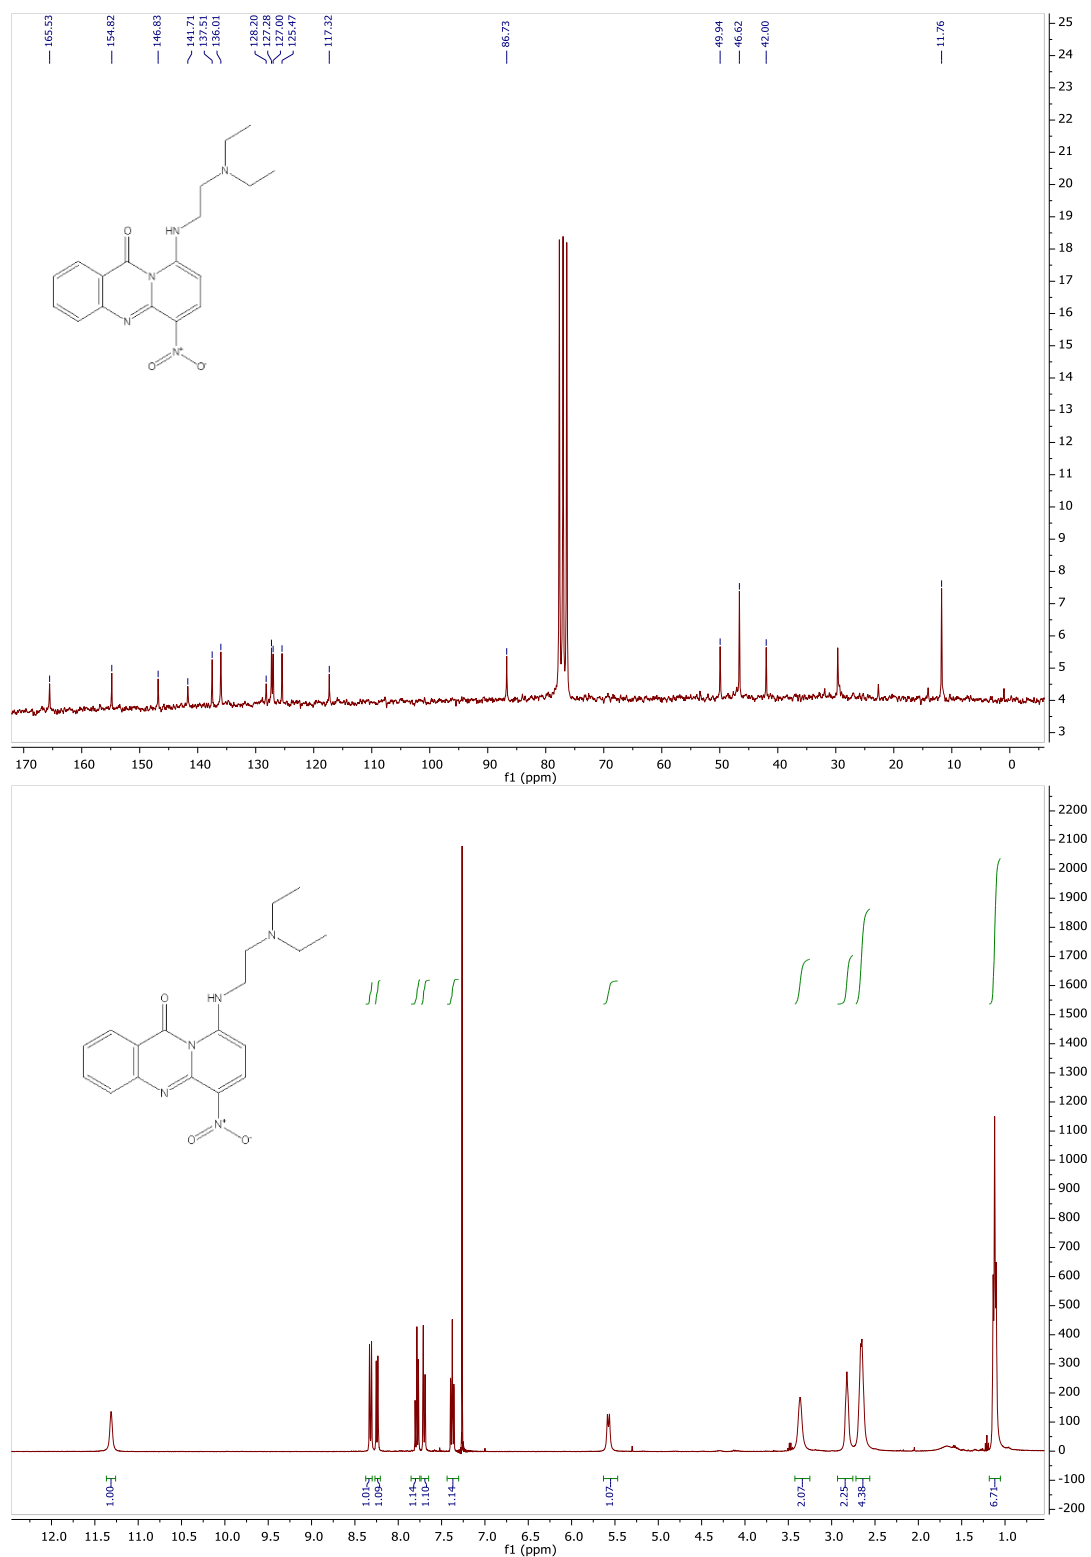

**Figure S15:** <sup>1</sup>H-NMR and <sup>13</sup>C NMR spectrum of compound 22.

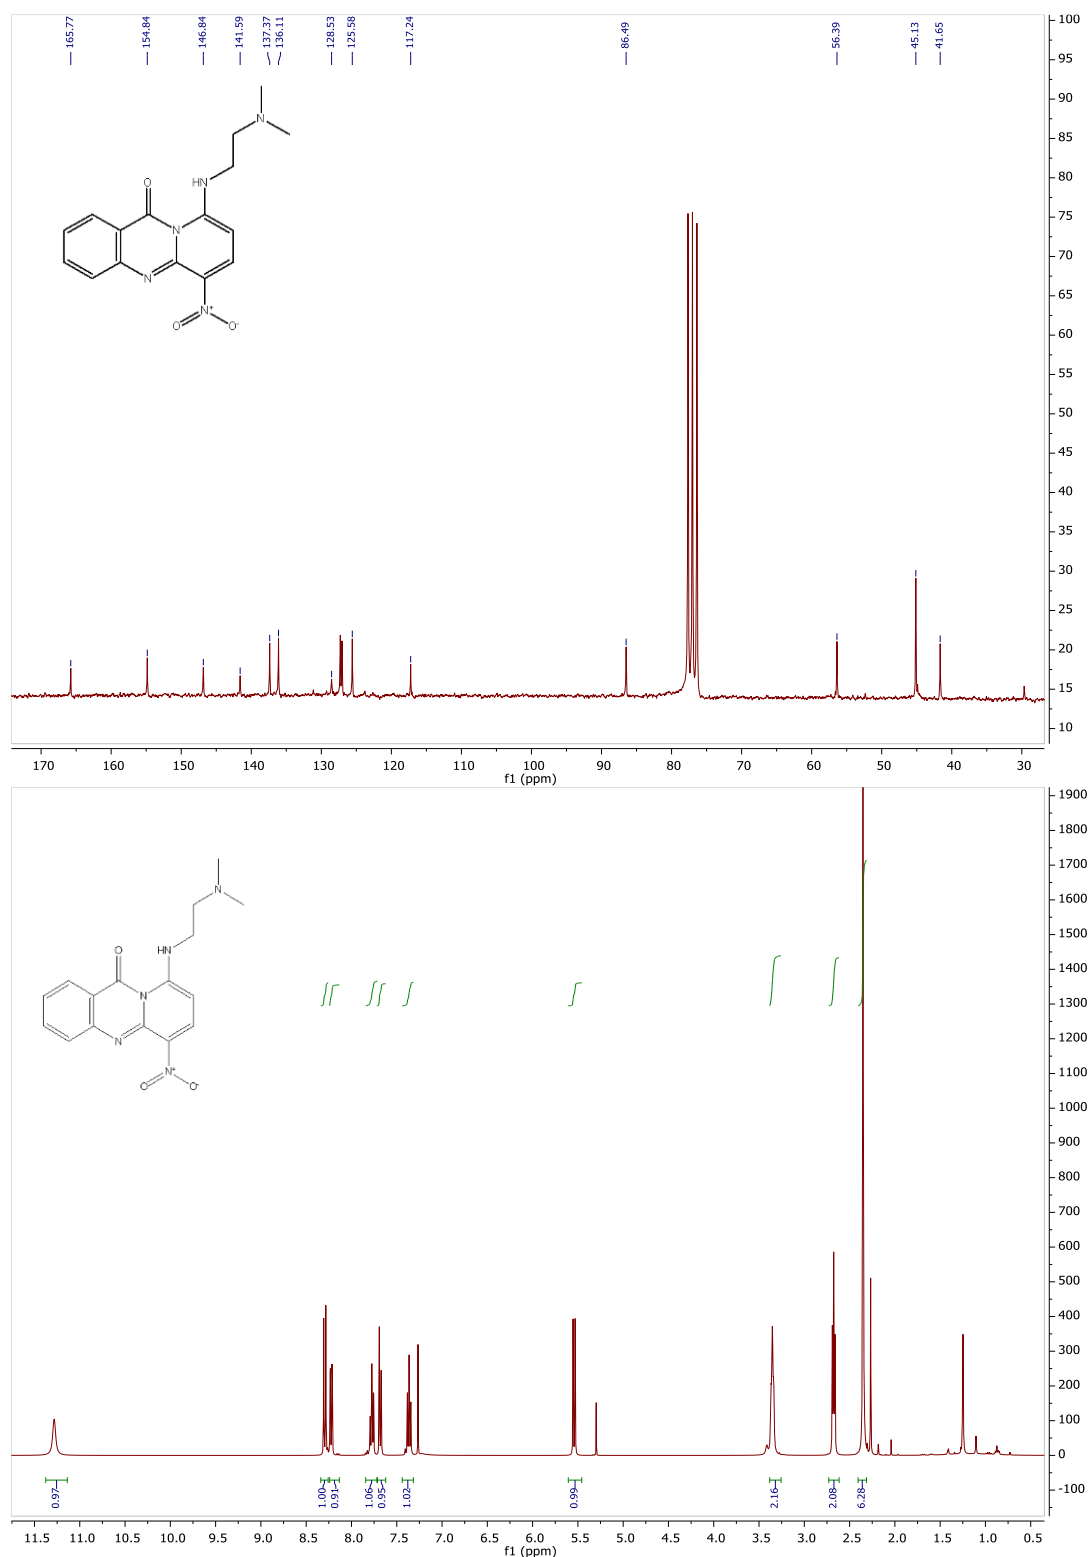

Figure S16:  $^1\text{H}$  NMR and  $^{13}\text{C}$  NMR spectrum of compound 23.

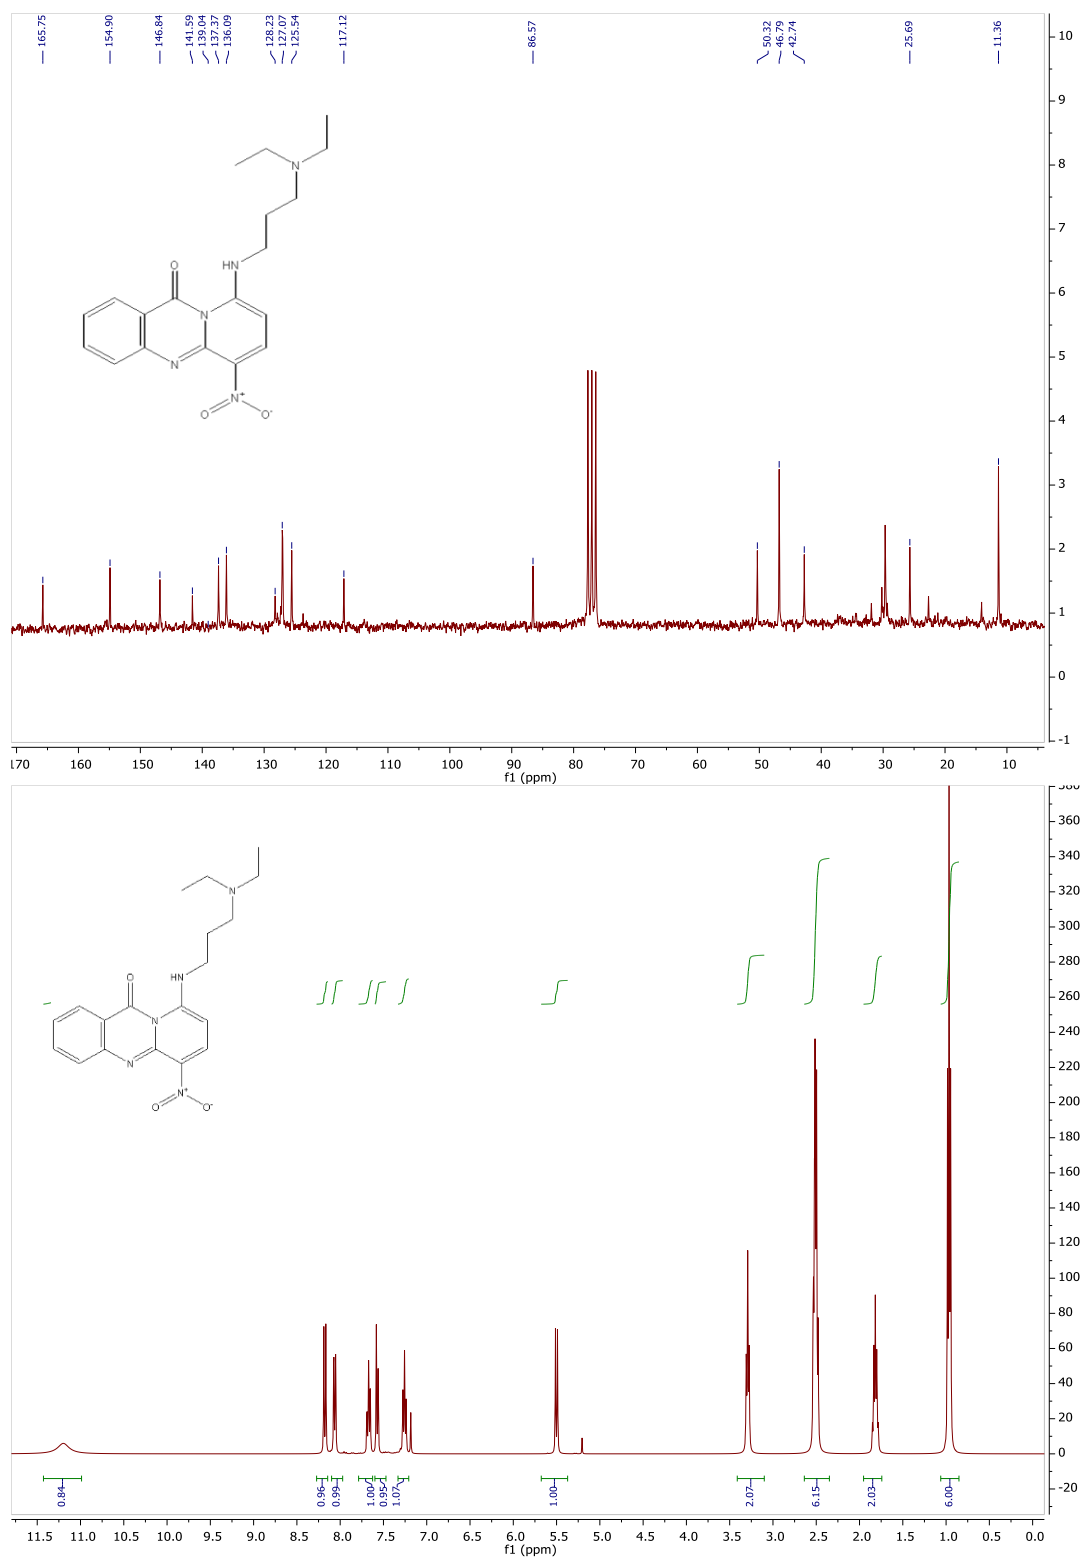

**Figure S17:** <sup>1</sup>H NMR and <sup>13</sup>C NMR spectrum of compound **24**.



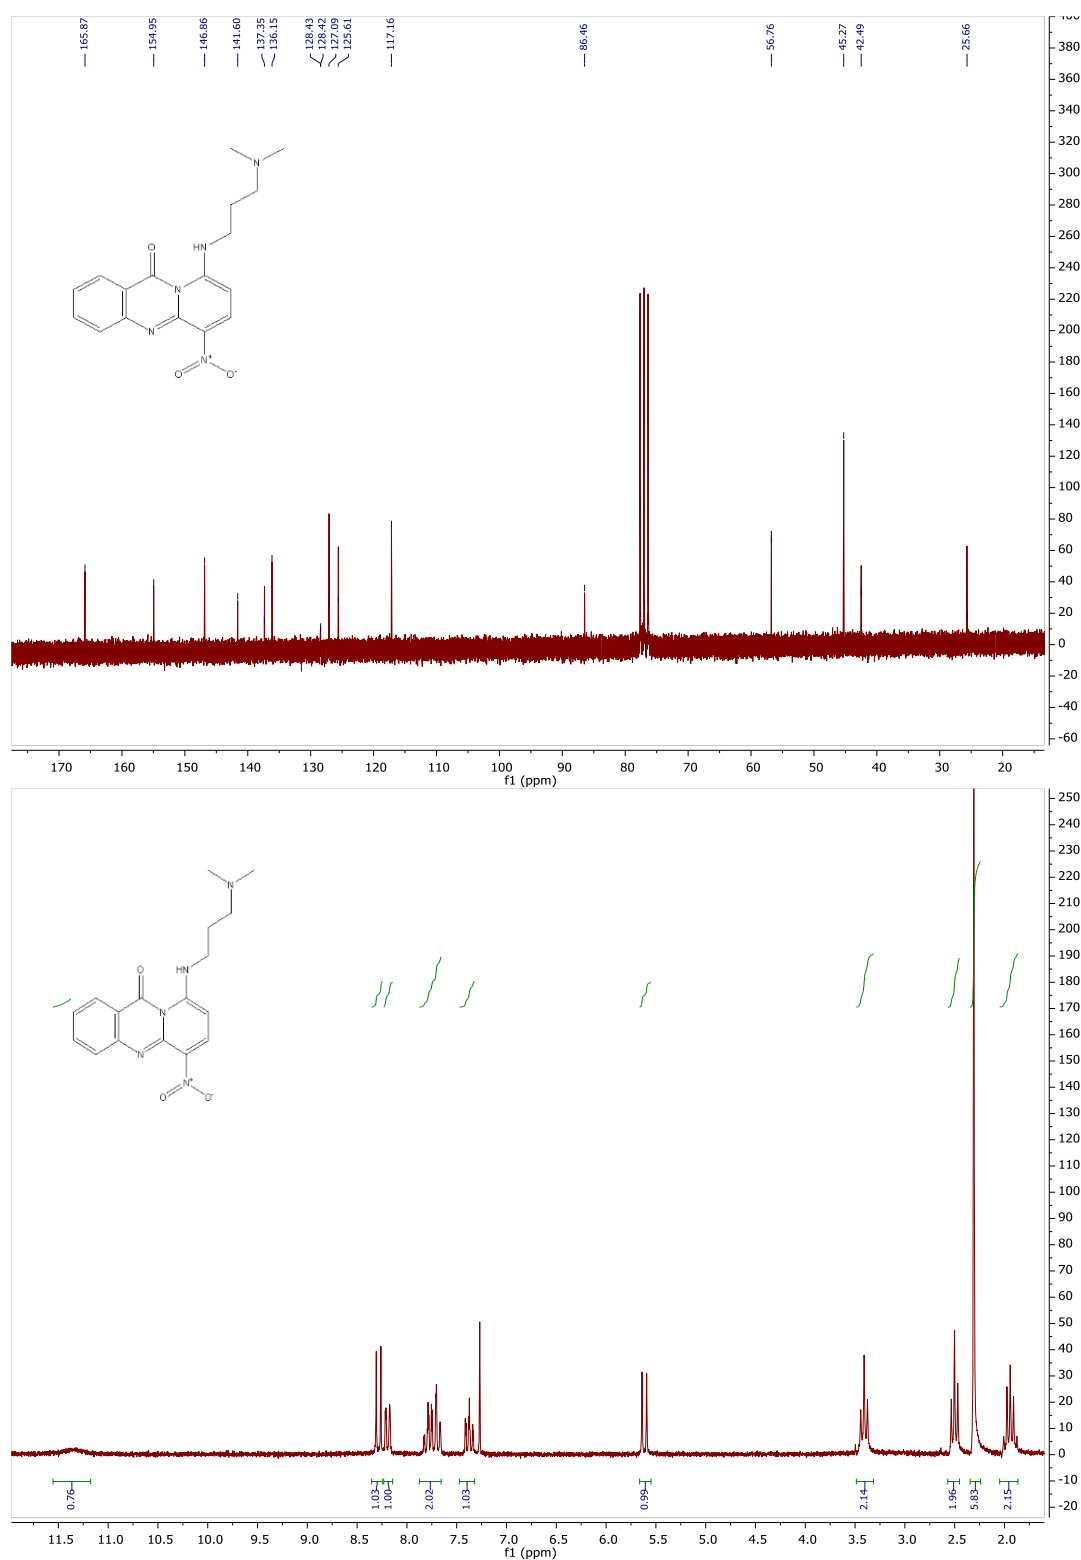

Figure S18: <sup>1</sup>H NMR and <sup>13</sup>C NMR spectrum of compound 25.

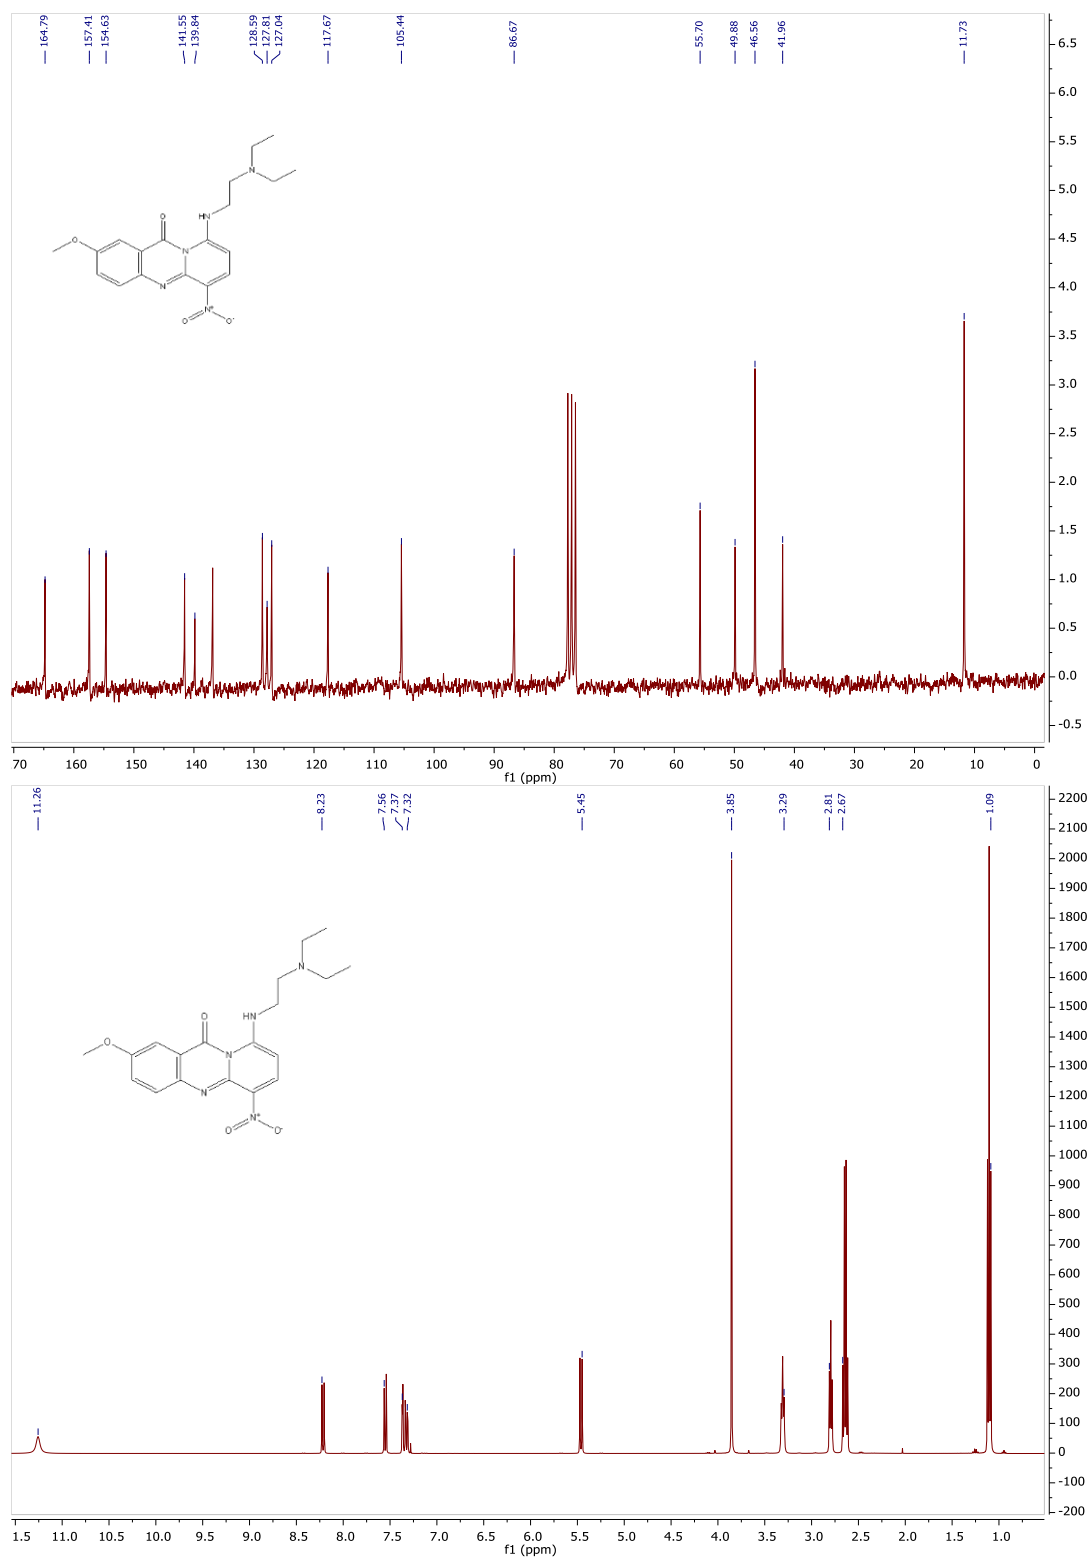

**Figure S19:** <sup>1</sup>H NMR and <sup>13</sup>C NMR spectrum of compound 26.

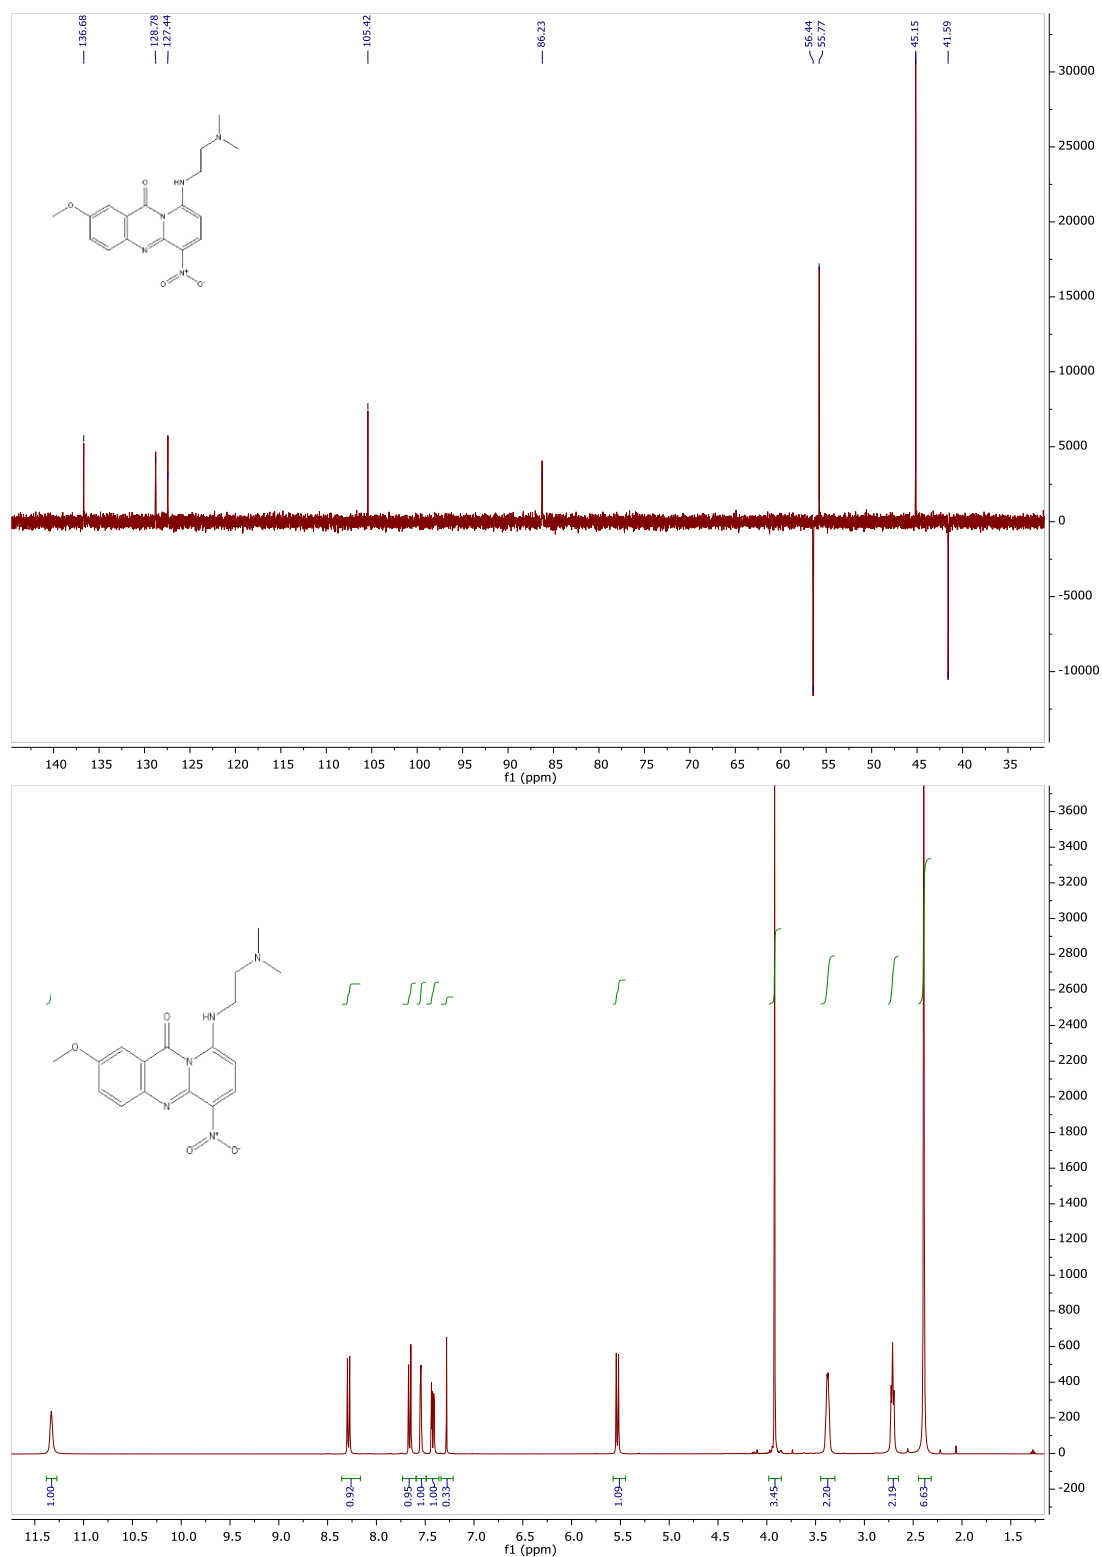

Figure S20:  $^1\text{H}$  NMR and  $^{13}\text{C}$  NMR spectrum of compound 27.

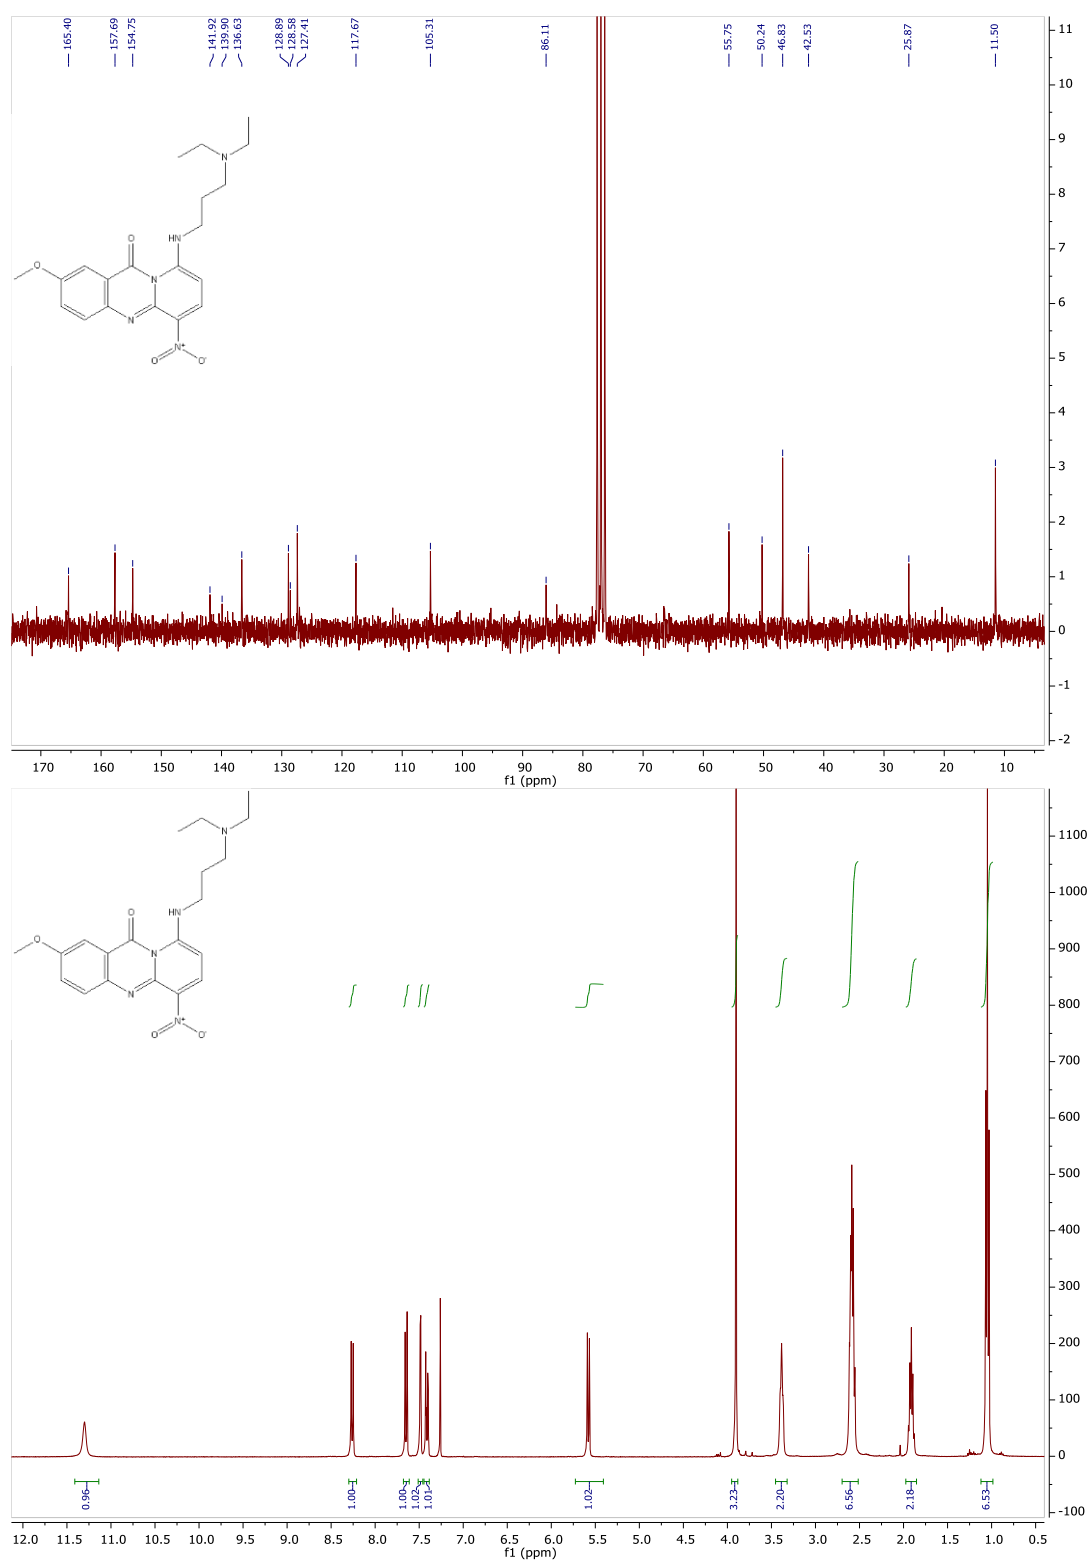

Figure S21: <sup>1</sup>H NMR and <sup>13</sup>C NMR spectrum of compound 28.

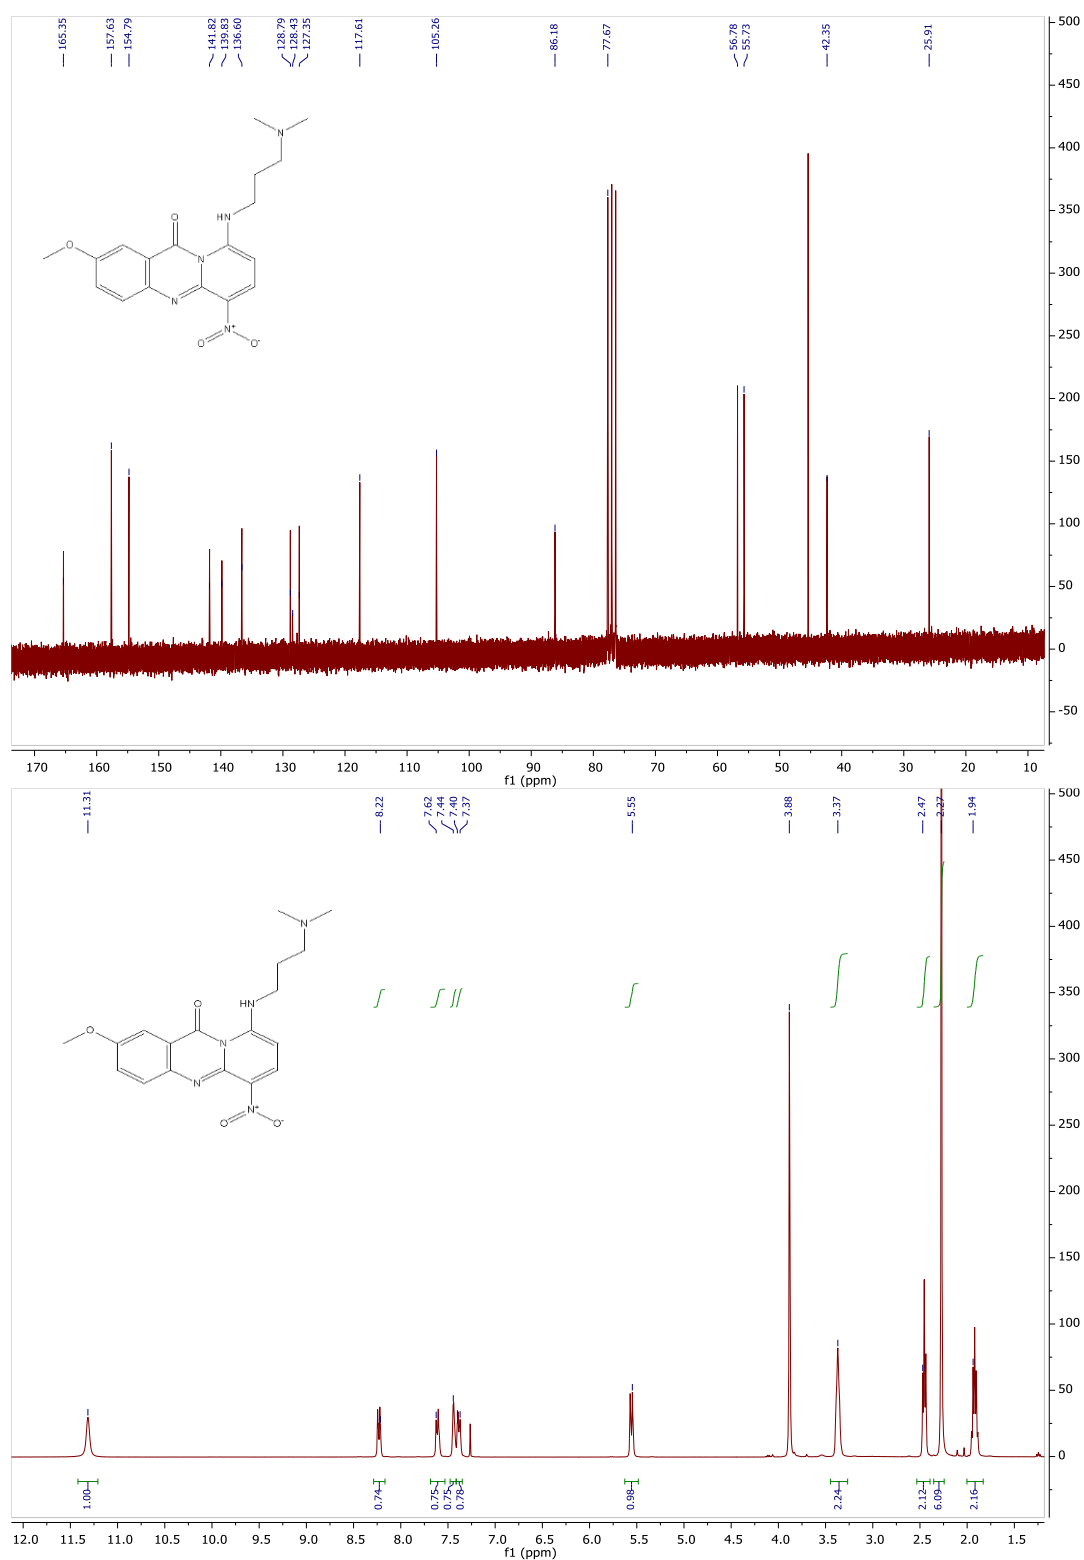

**Figure S22:** <sup>1</sup>H NMR and <sup>13</sup>C NMR spectrum of compound 29.

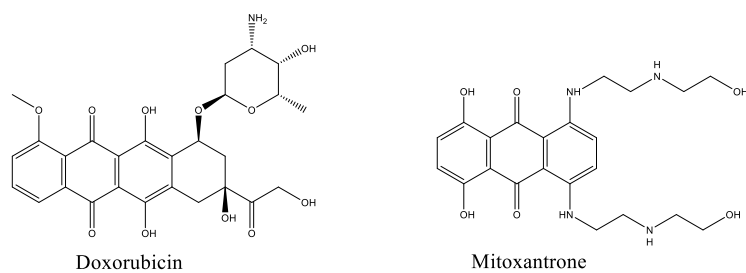

**Figure S23:** Structures of positive controls
